# Supplementary material
Source: PubMed Central journal article supplement (PMC9247342)
Supplement: mmc1.pdf [file mmc1.pdf]

**Biophysical Journal, Volume 121**

**Supplemental information**

**The susceptibility of disulfide bonds to modification in keratin fibers  
undergoing tensile stress**

**Duane P. Harland, Crisan Popescu, Marina Richena, Santanu Deb-Choudhury, Claudia  
Wichlatz, Erin Lee, and Jeffrey E. Plowman**

## *Supplementary file for*

# The susceptibility of disulfide bonds to modification in keratin fibres undergoing tensile stress

Duane P. Harland<sup>1</sup>, Crisan Popescu<sup>2,3</sup>, Marina Richena<sup>1</sup>, Santanu Deb-Choudhury<sup>1</sup>, Claudia Wichlatz<sup>2</sup>, Erin Lee<sup>1</sup> and Jeffrey E. Plowman<sup>1</sup>

<sup>1</sup> AgResearch, 1365 Springs Road, Lincoln 7674, New Zealand

<sup>2</sup> DWI, Forckenbeckstrasse 50, D-52056, Aachen, Germany

<sup>3</sup> Kao Germany GmbH, Pfungstaedterstrasse 92-100, D-6427, Darmstadt, Germany

## Contents

|                                                                                     |    |
|-------------------------------------------------------------------------------------|----|
| Data tables of peptides for each sample .....                                       | 2  |
| Supplementary Table 1. Controls.....                                                | 2  |
| Supplementary Table 2. Sample 1a .....                                              | 10 |
| Supplementary Table 3. Sample 1b .....                                              | 18 |
| Supplementary Table 4 - Sample 2a .....                                             | 25 |
| Supplementary Table 5 - Sample 2b .....                                             | 34 |
| Coloured version of summary Table 2 .....                                           | 42 |
| Fibre diameter distribution and other characteristics measured by OFDA method ..... | 43 |
| Tensile breakage of single fibres from same sample.....                             | 43 |

## Data tables of peptides for each sample

### Supplementary Table 1. Controls

Supplementary Table 1

| <b>Control 1</b> |                       |                                          |                                                                                                                                                                                          |
|------------------|-----------------------|------------------------------------------|------------------------------------------------------------------------------------------------------------------------------------------------------------------------------------------|
| <b>Sequence</b>  | <b>Modifications</b>  | <b>Accessions</b>                        | <b>Proteins</b>                                                                                                                                                                          |
| PTSCQPAPCR       | Carbamidomethyl: 9    | gi 999000041                             | KAP 2.3 var2 (tentative) cs39 [Ovis aries]                                                                                                                                               |
| CGPCNSYVR        | Carbamidomethyl: 1, 4 | gi 164652864                             | keratin 31 [Ovis aries]                                                                                                                                                                  |
| SLCGSGYGCGSR     | Carbamidomethyl: 9    | gi 224555998                             | keratin associated protein 6 [Ovis aries]                                                                                                                                                |
| SVSALGSCGPR      | Carbamidomethyl: 8    | gi 125117                                | RecName: Full=Keratin, type II microfibrillar, component 5                                                                                                                               |
| TFSSCSAVAPK      | Carbamidomethyl: 5    | gi 125117                                | RecName: Full=Keratin, type II microfibrillar, component 5                                                                                                                               |
| VGGSilGCK        | Carbamidomethyl: 8    | gi 312283584                             | hair keratin type II intermediate filament [Ovis aries]                                                                                                                                  |
| CCITAAPYR        | Carbamidomethyl: 1, 2 | gi 312283584; gi 1308; gi 312283588      | hair keratin type II intermediate filament [Ovis aries]    hair type II keratin intermediate filament protein [Ovis aries]    keratin 83 [Ovis aries]                                    |
| CCITAAPYR        | Carbamidomethyl: 1    | gi 312283584; gi 1308; gi 312283588      | hair keratin type II intermediate filament [Ovis aries]    hair type II keratin intermediate filament protein [Ovis aries]    keratin 83 [Ovis aries]                                    |
| GGVACGGLTYSSTAGR | Carbamidomethyl: 5    | gi 125117                                | RecName: Full=Keratin, type II microfibrillar, component 5                                                                                                                               |
| DVDCAYLK         | Carbamidomethyl: 4    | gi 312283584; gi 1308; gi 125117         | hair keratin type II intermediate filament [Ovis aries]    hair type II keratin intermediate filament protein [Ovis aries]    RecName: Full=Keratin, type II microfibrillar, component 5 |
| LGGYGCYGYGYSR    | Carbamidomethyl: 7    | gi 224555998                             | keratin associated protein 6 [Ovis aries]                                                                                                                                                |
| TGCFSTVSGFGSR    | Carbamidomethyl: 2    | gi 312283588                             | keratin 83 [Ovis aries]                                                                                                                                                                  |
| AVPAFSCVSACGPR   | Carbamidomethyl: 7    | gi 312283584                             | hair keratin type II intermediate filament [Ovis aries]                                                                                                                                  |
| ILDELTLCCK       | Carbamidomethyl: 8    | gi 312283590; gi 164652864; gi 426238003 | keratin 33B [Ovis aries]    keratin 31 [Ovis aries]    PREDICTED: keratin 34 [Ovis aries]                                                                                                |
| DLNMDCVVAEIK     | Carbamidomethyl: 6    | gi 125117                                | RecName: Full=Keratin, type II microfibrillar, component 5                                                                                                                               |
| DLNMDCIVAEIK     | Carbamidomethyl: 6    | gi 312283588                             | keratin 83 [Ovis aries]                                                                                                                                                                  |

|                                          |                       |                                                |                                                                                                                                                                                                                                           |
|------------------------------------------|-----------------------|------------------------------------------------|-------------------------------------------------------------------------------------------------------------------------------------------------------------------------------------------------------------------------------------------|
| QCCESNLEPLFSGYIETLRR                     | Carbamidomethyl: 2    | gi 312283584; gi 1308                          | hair keratin type II intermediate filament [Ovis aries]    hair type II keratin intermediate filament protein [Ovis aries]                                                                                                                |
| <b>Control 2</b>                         |                       |                                                |                                                                                                                                                                                                                                           |
| <b>Sequence</b>                          | <b>Modifications</b>  | <b>Accessions</b>                              | <b>Proteins</b>                                                                                                                                                                                                                           |
| EAE <u>C</u> VEADSGR                     | Carbamidomethyl: 4    | gi 312283588                                   | keratin 83 [Ovis aries]                                                                                                                                                                                                                   |
| TYQ <u>Q</u> S <u>C</u> VSSCR            | Carbamidomethyl: 6    | gi 999000018                                   | KAP 11.1 (tentative) cs39 [Ovis aries]                                                                                                                                                                                                    |
| LG <u>C</u> GSGFR                        | Carbamidomethyl: 3    | gi 999000015                                   | KAP 19.5 (tentative) cs39 [Ovis aries]                                                                                                                                                                                                    |
| <u>C</u> GP <u>C</u> NSYVR               | Carbamidomethyl: 1, 4 | gi 999000013                                   | IFP Type I K31 var1 (tentative) cs39 [Ovis aries]                                                                                                                                                                                         |
| TGPATTI <u>C</u> SSDK                    | Carbamidomethyl: 8    | gi 229307                                      | keratin SCMKIIB2                                                                                                                                                                                                                          |
| AF <u>S</u> <u>C</u> VSA <u>C</u> GPRPGR | Carbamidomethyl: 4, 8 | gi 312283584; gi 1308; gi 312283588            | hair keratin type II intermediate filament [Ovis aries]    hair type II keratin intermediate filament protein [Ovis aries]    keratin 83 [Ovis aries]                                                                                     |
| VGG <u>S</u> ILG <u>C</u> K              | Carbamidomethyl: 8    | gi 312283584                                   | hair keratin type II intermediate filament [Ovis aries]                                                                                                                                                                                   |
| <u>C</u> CITAAPYR                        | Carbamidomethyl: 1, 2 | gi 312283584; gi 1308; gi 312283588            | hair keratin type II intermediate filament [Ovis aries]    hair type II keratin intermediate filament protein [Ovis aries]    keratin 83 [Ovis aries]                                                                                     |
| <u>C</u> CITAAPYR                        | Carbamidomethyl: 1    | gi 312283584; gi 1308; gi 312283588            | hair keratin type II intermediate filament [Ovis aries]    hair type II keratin intermediate filament protein [Ovis aries]    keratin 83 [Ovis aries]                                                                                     |
| GGVA <u>C</u> GGLTYSSTAGR                | Carbamidomethyl: 5    | gi 246276; gi 164652870                        | type II intermediate-filament protein component 5 [sheep, wool, Peptide, 503 aa]    keratin 85 [Ovis aries]                                                                                                                               |
| DVD <u>C</u> AYLR                        | Carbamidomethyl: 4    | gi 312283584; gi 1308; gi 246276; gi 164652870 | hair keratin type II intermediate filament [Ovis aries]    hair type II keratin intermediate filament protein [Ovis aries]    type II intermediate-filament protein component 5 [sheep, wool, Peptide, 503 aa]    keratin 85 [Ovis aries] |
| LG <u>C</u> GY <u>C</u> GYGYGSR          | Carbamidomethyl: 3, 7 | gi 999000021                                   | KAP 6.1 (tentative) cs39 [Ovis aries]                                                                                                                                                                                                     |
| LG <u>C</u> GY <u>C</u> GYGYGSR          | Carbamidomethyl: 7    | gi 999000021                                   | KAP 6.1 (tentative) cs39 [Ovis aries]                                                                                                                                                                                                     |
| L <u>C</u> EGVGAVNVCVSSSR                | Carbamidomethyl: 2    | gi 312283584; gi 312283588                     | hair keratin type II intermediate filament [Ovis aries]    keratin 83 [Ovis aries]                                                                                                                                                        |
| ILDELTL <u>C</u> K                       | Carbamidomethyl: 8    | gi 999000013; gi 312283590; gi 426238003       | IFP Type I K31 var1 (tentative) cs39 [Ovis aries]    keratin 33B [Ovis aries]    PREDICTED: keratin 34 [Ovis aries]                                                                                                                       |
| YSG <u>S</u> <u>C</u> GSSFPSNLVYR        | Carbamidomethyl: 6    | gi 999000030                                   | KAP 13.1 (tentative) cs39 [Ovis aries]                                                                                                                                                                                                    |

|                                  |                       |                                                |                                                                                                                                                                                          |
|----------------------------------|-----------------------|------------------------------------------------|------------------------------------------------------------------------------------------------------------------------------------------------------------------------------------------|
| DLNMD <u>C</u> IVAEIK            | Carbamidomethyl: 6    | gi 312283588                                   | keratin 83 [Ovis aries]                                                                                                                                                                  |
| Q <u>C</u> CESNLEPLFSGYIETLRR    | Carbamidomethyl: 2, 3 | gi 312283584; gi 1308                          | hair keratin type II intermediate filament [Ovis aries]    hair type II keratin intermediate filament protein [Ovis aries]                                                               |
| Q <u>C</u> CESNLEPLFSGYIETLRR    | Carbamidomethyl: 2    | gi 312283584; gi 1308                          | hair keratin type II intermediate filament [Ovis aries]    hair type II keratin intermediate filament protein [Ovis aries]                                                               |
| SDLEAQVESLKEELL <u>C</u> LK      | Carbamidomethyl: 16   | gi 426238003                                   | PREDICTED: keratin 34 [Ovis aries]                                                                                                                                                       |
| SDLEAQVESLKEELI <u>C</u> LK      | Carbamidomethyl: 16   | gi 999000013; gi 312283590                     | IFP Type I K31 var1 (tentative) cs39 [Ovis aries]    keratin 33B [Ovis aries]                                                                                                            |
|                                  |                       |                                                |                                                                                                                                                                                          |
| <b>Control 3</b>                 |                       |                                                |                                                                                                                                                                                          |
| <b>Sequence</b>                  | <b>Modifications</b>  | <b>Accessions</b>                              | <b>Proteins</b>                                                                                                                                                                          |
| <u>C</u> PSSFGR                  | Carbamidomethyl: 1    | gi 999000016                                   | KAP 19.3 (tentative) cs39 [Ovis aries]                                                                                                                                                   |
| TGPATTI <u>C</u> SSDK            | Carbamidomethyl: 8    | gi 229307                                      | keratin SCMKIIB2                                                                                                                                                                         |
| SLCGSGYG <u>C</u> GSR            | Carbamidomethyl: 9    | gi 32329266                                    | high-glycine tyrosine keratin type II.6 [Capra hircus]                                                                                                                                   |
| SVSALG <u>S</u> CGPR             | Carbamidomethyl: 8    | gi 125117                                      | RecName: Full=Keratin, type II microfibrillar, component 5                                                                                                                               |
| VGG <u>S</u> ILG <u>C</u> K      | Carbamidomethyl: 8    | gi 312283584                                   | hair keratin type II intermediate filament [Ovis aries]                                                                                                                                  |
| <u>C</u> CITAAPYR                | Carbamidomethyl: 1, 2 | gi 312283584; gi 312283588; gi 1308            | hair keratin type II intermediate filament [Ovis aries]    keratin 83 [Ovis aries]    hair type II keratin intermediate filament protein [Ovis aries]                                    |
| <u>C</u> CITAAPYR                | Carbamidomethyl: 1    | gi 312283584; gi 312283588; gi 1308            | hair keratin type II intermediate filament [Ovis aries]    keratin 83 [Ovis aries]    hair type II keratin intermediate filament protein [Ovis aries]                                    |
| AF <u>S</u> CVSACGPR             | Carbamidomethyl: 4    | gi 312283588; gi 1308                          | keratin 83 [Ovis aries]    hair type II keratin intermediate filament protein [Ovis aries]                                                                                               |
| GGV <u>A</u> CGGLTYSSTAGR        | Carbamidomethyl: 5    | gi 125117                                      | RecName: Full=Keratin, type II microfibrillar, component 5                                                                                                                               |
| DVD <u>C</u> AYLR                | Carbamidomethyl: 4    | gi 312283584; gi 1308; gi 125117               | hair keratin type II intermediate filament [Ovis aries]    hair type II keratin intermediate filament protein [Ovis aries]    RecName: Full=Keratin, type II microfibrillar, component 5 |
| LG <u>C</u> GYG <u>C</u> GYGYGSR | Carbamidomethyl: 3, 7 | gi 32329266                                    | high-glycine tyrosine keratin type II.6 [Capra hircus]                                                                                                                                   |
| LG <u>C</u> GYGCGYGYGSR          | Carbamidomethyl: 3    | gi 32329266                                    | high-glycine tyrosine keratin type II.6 [Capra hircus]                                                                                                                                   |
| QDMA <u>C</u> LLK                | Carbamidomethyl: 5    | gi 312283584; gi 312283588; gi 1308; gi 125117 | hair keratin type II intermediate filament [Ovis aries]    keratin 83 [Ovis aries]    hair type II                                                                                       |

|                    |                        |                                                        |                                                                                                                                                                           |
|--------------------|------------------------|--------------------------------------------------------|---------------------------------------------------------------------------------------------------------------------------------------------------------------------------|
|                    |                        |                                                        | keratin intermediate filament protein [Ovis aries]    RecName: Full=Keratin, type II microfibrillar, component 5                                                          |
| T_CGFSTVGSFGSR     | Carbamidomethyl: 2     | gi 312283588                                           | keratin 83 [Ovis aries]                                                                                                                                                   |
| AVPAFSCV_SACGPR    | Carbamidomethyl: 7, 11 | gi 312283584                                           | hair keratin type II intermediate filament [Ovis aries]                                                                                                                   |
| L_CEGVGAVNVCVSSSR  | Carbamidomethyl: 2     | gi 312283584; gi 312283588                             | hair keratin type II intermediate filament [Ovis aries]    keratin 83 [Ovis aries]                                                                                        |
| AVPAFSCV_SACGPR    | Carbamidomethyl: 7     | gi 312283584                                           | hair keratin type II intermediate filament [Ovis aries]                                                                                                                   |
| ILDELT_LCK         | Carbamidomethyl: 8     | gi 312283590; gi 999000013; gi 999000014; gi 426238003 | keratin 33B [Ovis aries]    IFP Type I K31 var1 (tentative) cs39 [Ovis aries]    IFP Type I K33a var1 (tentative) cs39 [Ovis aries]    PREDICTED: keratin 34 [Ovis aries] |
| YSGSS_CGSSFPSNLVYR | Carbamidomethyl: 6     | gi 999000030                                           | KAP 13.1 (tentative) cs39 [Ovis aries]                                                                                                                                    |
|                    |                        |                                                        |                                                                                                                                                                           |
| <b>Control 4</b>   |                        |                                                        |                                                                                                                                                                           |
| <b>Sequence</b>    | <b>Modifications</b>   | <b>Accessions</b>                                      | <b>Proteins</b>                                                                                                                                                           |
| PTSCQPAP_CPR       | Carbamidomethyl: 4, 9  | gi 999000041                                           | KAP 2.3 var2 (tentative) cs39 [Ovis aries]                                                                                                                                |
| PTSCQPAP_CPR       | Carbamidomethyl: 4     | gi 999000041                                           | KAP 2.3 var2 (tentative) cs39 [Ovis aries]                                                                                                                                |
| PTSCQPAP_CPR       | Carbamidomethyl: 9     | gi 999000041                                           | KAP 2.3 var2 (tentative) cs39 [Ovis aries]                                                                                                                                |
| TYQQSCVSS_CPR      | Carbamidomethyl: 10    | gi 328905561                                           | keratin-associated protein KAP11-1 [Ovis aries]                                                                                                                           |
| LG_CGSGFR          | Carbamidomethyl: 3     | gi 999000015                                           | KAP 19.5 (tentative) cs39 [Ovis aries]                                                                                                                                    |
| C_GPCNSYVR         | Carbamidomethyl: 1     | gi 999000013                                           | IFP Type I K31 var1 (tentative) cs39 [Ovis aries]                                                                                                                         |
| SVSALGSC_GPR       | Carbamidomethyl: 8     | gi 246276                                              | type II intermediate-filament protein component 5 [sheep, wool, Peptide, 503 aa]                                                                                          |
| TFSS_CSAVAPK       | Carbamidomethyl: 5     | gi 246276                                              | type II intermediate-filament protein component 5 [sheep, wool, Peptide, 503 aa]                                                                                          |
| VGG_SILGCK         | Carbamidomethyl: 8     | gi 312283584                                           | hair keratin type II intermediate filament [Ovis aries]                                                                                                                   |
| C_CITAAPYR         | Carbamidomethyl: 1, 2  | gi 312283584; gi 1308; gi 312283588                    | hair keratin type II intermediate filament [Ovis aries]    hair type II keratin intermediate filament protein [Ovis aries]    keratin 83 [Ovis aries]                     |
| C_CITAAPYR         | Carbamidomethyl: 1     | gi 312283584; gi 1308; gi 312283588                    | hair keratin type II intermediate filament [Ovis aries]    hair type II keratin intermediate filament protein [Ovis aries]    keratin 83 [Ovis aries]                     |
| LE_CINTYR          | Carbamidomethyl: 3     | gi 999000013; gi 312283592                             | IFP Type I K31 var1 (tentative) cs39 [Ovis aries]    keratin 33 [Ovis aries]                                                                                              |

|                    |                        |                                                        |                                                                                                                                                                                                                |
|--------------------|------------------------|--------------------------------------------------------|----------------------------------------------------------------------------------------------------------------------------------------------------------------------------------------------------------------|
| AFSCVSAACGPR       | Carbamidomethyl: 4     | gi 1308; gi 312283588                                  | hair type II keratin intermediate filament protein [Ovis aries]    keratin 83 [Ovis aries]                                                                                                                     |
| ARLECEINTYR        | Carbamidomethyl: 5     | gi 999000013; gi 312283592                             | IFP Type I K31 var1 (tentative) cs39 [Ovis aries]    keratin 33 [Ovis aries]                                                                                                                                   |
| DVDCAYLRL          | Carbamidomethyl: 4     | gi 312283584; gi 1308; gi 246276                       | hair keratin type II intermediate filament [Ovis aries]    hair type II keratin intermediate filament protein [Ovis aries]    type II intermediate-filament protein component 5 [sheep, wool, Peptide, 503 aa] |
| AVPAFSCVSAACGPRPGR | Carbamidomethyl: 7, 11 | gi 312283584                                           | hair keratin type II intermediate filament [Ovis aries]                                                                                                                                                        |
| LCEGVGSVNVCVSSSR   | Carbamidomethyl: 2     | gi 1308; gi 246276                                     | hair type II keratin intermediate filament protein [Ovis aries]    type II intermediate-filament protein component 5 [sheep, wool, Peptide, 503 aa]                                                            |
| ILDELTLCCK         | Carbamidomethyl: 8     | gi 999000013; gi 312283590; gi 309323371; gi 312283592 | IFP Type I K31 var1 (tentative) cs39 [Ovis aries]    keratin 33B [Ovis aries]    keratin 34 [Ovis aries]    keratin 33 [Ovis aries]                                                                            |
| SQQQEPLVCPNYQSYFR  | Carbamidomethyl: 9     | gi 999000013; gi 312283590; gi 312283592               | IFP Type I K31 var1 (tentative) cs39 [Ovis aries]    keratin 33B [Ovis aries]    keratin 33 [Ovis aries]                                                                                                       |
| DLNMDCVVAEIK       | Carbamidomethyl: 6     | gi 246276                                              | type II intermediate-filament protein component 5 [sheep, wool, Peptide, 503 aa]                                                                                                                               |
| DLNMDCIVAIEIK      | Carbamidomethyl: 6     | gi 312283588                                           | keratin 83 [Ovis aries]                                                                                                                                                                                        |
| SDLEAQVESLKEELLCLK | Carbamidomethyl: 16    | gi 309323371                                           | keratin 34 [Ovis aries]                                                                                                                                                                                        |
| SDLEAQVESLKEELICLK | Carbamidomethyl: 16    | gi 999000013; gi 312283590                             | IFP Type I K31 var1 (tentative) cs39 [Ovis aries]    keratin 33B [Ovis aries]                                                                                                                                  |
|                    |                        |                                                        |                                                                                                                                                                                                                |
| <b>Control 5</b>   |                        |                                                        |                                                                                                                                                                                                                |
| <b>Sequence</b>    | <b>Modifications</b>   | <b>Accessions</b>                                      | <b>Proteins</b>                                                                                                                                                                                                |
| PTSCQPAPCR         | Carbamidomethyl: 4, 9  | gi 999000041                                           | KAP 2.3 var2 (tentative) cs39 [Ovis aries]                                                                                                                                                                     |
| LGCSSGFR           | Carbamidomethyl: 3     | gi 999000015                                           | KAP 19.5 (tentative) cs39 [Ovis aries]                                                                                                                                                                         |
| SVSALGSCGPR        | Carbamidomethyl: 8     | gi 246276                                              | type II intermediate-filament protein component 5 [sheep, wool, Peptide, 503 aa]                                                                                                                               |
| VGGSSILGCK         | Carbamidomethyl: 8     | gi 312283584                                           | hair keratin type II intermediate filament [Ovis aries]                                                                                                                                                        |
| CCITAAPYR          | Carbamidomethyl: 1, 2  | gi 312283588; gi 312283584; gi 1308                    | keratin 83 [Ovis aries]    hair keratin type II intermediate filament [Ovis aries]    hair type II keratin intermediate filament protein [Ovis aries]                                                          |
| CCITAAPYR          | Carbamidomethyl: 1     | gi 312283588; gi 312283584; gi 1308                    | keratin 83 [Ovis aries]    hair keratin type II intermediate filament [Ovis aries]    hair type II keratin intermediate filament protein [Ovis aries]                                                          |

|                                               |                       |                                                              |                                                                                                                                                                                                                                                                      |
|-----------------------------------------------|-----------------------|--------------------------------------------------------------|----------------------------------------------------------------------------------------------------------------------------------------------------------------------------------------------------------------------------------------------------------------------|
| GGVACGGLTYSSTAGR                              | Carbamidomethyl: 5    | gi 246276; gi 164652870                                      | type II intermediate-filament protein component 5 [sheep, wool, Peptide, 503 aa]    keratin 85 [Ovis aries]                                                                                                                                                          |
| DVDCAYLR                                      | Carbamidomethyl: 4    | gi 312283584; gi 246276; gi 1308; gi 164652870               | hair keratin type II intermediate filament [Ovis aries]    type II intermediate-filament protein component 5 [sheep, wool, Peptide, 503 aa]    hair type II keratin intermediate filament protein [Ovis aries]    keratin 85 [Ovis aries]                            |
| QDMA <sup>+</sup> LLK                         | Carbamidomethyl: 5    | gi 312283588; gi 312283584; gi 246276; gi 1308; gi 164652870 | keratin 83 [Ovis aries]    hair keratin type II intermediate filament [Ovis aries]    type II intermediate-filament protein component 5 [sheep, wool, Peptide, 503 aa]    hair type II keratin intermediate filament protein [Ovis aries]    keratin 85 [Ovis aries] |
| T <sup>+</sup> CGFSTVGSFGSR                   | Carbamidomethyl: 2    | gi 312283588                                                 | keratin 83 [Ovis aries]                                                                                                                                                                                                                                              |
| ILDELT <sup>+</sup> LCK                       | Carbamidomethyl: 8    | gi 312283590; gi 999000013; gi 426238003; gi 125091          | keratin 33B [Ovis aries]    IFP Type I K31 var1 (tentative) cs39 [Ovis aries]    PREDICTED: keratin 34 [Ovis aries]    RecName: Full=Keratin, type I microfibrillar, 47.6 kDa; AltName: Full=Low-sulfur keratin                                                      |
| YSGSS <sup>+</sup> CGSSFPSNLVYR               | Carbamidomethyl: 6    | gi 999000030                                                 | KAP 13.1 (tentative) cs39 [Ovis aries]                                                                                                                                                                                                                               |
| SQQQEPLV <sup>+</sup> C <sup>+</sup> PNYQSYFR | Carbamidomethyl: 9    | gi 312283590; gi 999000013; gi 426238003; gi 125091          | keratin 33B [Ovis aries]    IFP Type I K31 var1 (tentative) cs39 [Ovis aries]    PREDICTED: keratin 34 [Ovis aries]    RecName: Full=Keratin, type I microfibrillar, 47.6 kDa; AltName: Full=Low-sulfur keratin                                                      |
| DLNMD <sup>+</sup> C <sup>+</sup> VVAEIK      | Carbamidomethyl: 6    | gi 246276; gi 164652870                                      | type II intermediate-filament protein component 5 [sheep, wool, Peptide, 503 aa]    keratin 85 [Ovis aries]                                                                                                                                                          |
| DLNMD <sup>+</sup> C <sup>+</sup> VAEIK       | Carbamidomethyl: 6    | gi 312283588                                                 | keratin 83 [Ovis aries]                                                                                                                                                                                                                                              |
| SDLEAQVESLKEELI <sup>+</sup> CLK              | Carbamidomethyl: 16   | gi 312283590; gi 999000013                                   | keratin 33B [Ovis aries]    IFP Type I K31 var1 (tentative) cs39 [Ovis aries]                                                                                                                                                                                        |
| SDLEAQVESLKEELL <sup>+</sup> CLK              | Carbamidomethyl: 16   | gi 426238003                                                 | PREDICTED: keratin 34 [Ovis aries]                                                                                                                                                                                                                                   |
|                                               |                       |                                                              |                                                                                                                                                                                                                                                                      |
| <b>Control 6</b>                              |                       |                                                              |                                                                                                                                                                                                                                                                      |
| <b>Sequence</b>                               | <b>Modifications</b>  | <b>Accessions</b>                                            | <b>Proteins</b>                                                                                                                                                                                                                                                      |
| PTSCQPAP <sup>+</sup> CR                      | Carbamidomethyl: 4, 9 | gi 999000041                                                 | KAP 2.3 var2 (tentative) cs39 [Ovis aries]                                                                                                                                                                                                                           |
| TFSS <sup>+</sup> CSAVAPK                     | Carbamidomethyl: 5    | gi 246276                                                    | type II intermediate-filament protein component 5 [sheep, wool, Peptide, 503 aa]                                                                                                                                                                                     |



|                                                      |                        |                                                        |                                                                                                                                                                                                                                           |
|------------------------------------------------------|------------------------|--------------------------------------------------------|-------------------------------------------------------------------------------------------------------------------------------------------------------------------------------------------------------------------------------------------|
| VGG <u>S</u> ILG <u>C</u> K                          | Carbamidomethyl: 8     | gi 312283584                                           | hair keratin type II intermediate filament [Ovis aries]                                                                                                                                                                                   |
| <u>C</u> CITAA <u>P</u> Y <u>R</u>                   | Carbamidomethyl: 1, 2  | gi 312283584; gi 1308; gi 312283588                    | hair keratin type II intermediate filament [Ovis aries]    hair type II keratin intermediate filament protein [Ovis aries]    keratin 83 [Ovis aries]                                                                                     |
| LE <u>C</u> EINT <u>Y</u> R                          | Carbamidomethyl: 3     | gi 164652864; gi 999000014                             | keratin 31 [Ovis aries]    IFP Type I K33a var1 (tentative) cs39 [Ovis aries]                                                                                                                                                             |
| DVD <u>C</u> AY <u>L</u> R                           | Carbamidomethyl: 4     | gi 312283584; gi 246276; gi 1308                       | hair keratin type II intermediate filament [Ovis aries]    type II intermediate-filament protein component 5 [sheep, wool, Peptide, 503 aa]    hair type II keratin intermediate filament protein [Ovis aries]                            |
| QDMA <u>C</u> LL <u>K</u>                            | Carbamidomethyl: 5     | gi 312283584; gi 246276; gi 1308; gi 312283588         | hair keratin type II intermediate filament [Ovis aries]    type II intermediate-filament protein component 5 [sheep, wool, Peptide, 503 aa]    hair type II keratin intermediate filament protein [Ovis aries]    keratin 83 [Ovis aries] |
| T <u>C</u> GFSTVGS <u>G</u> FG <u>S</u> R            | Carbamidomethyl: 2     | gi 312283588                                           | keratin 83 [Ovis aries]                                                                                                                                                                                                                   |
| AVPA <u>F</u> SC <u>V</u> SAC <u>G</u> PR            | Carbamidomethyl: 7, 11 | gi 312283584                                           | hair keratin type II intermediate filament [Ovis aries]                                                                                                                                                                                   |
| ILDEL <u>T</u> L <u>C</u> K                          | Carbamidomethyl: 8     | gi 312283590; gi 164652864; gi 426238003; gi 999000014 | keratin 33B [Ovis aries]    keratin 31 [Ovis aries]    PREDICTED: keratin 34 [Ovis aries]    IFP Type I K33a var1 (tentative) cs39 [Ovis aries]                                                                                           |
| YSG <u>S</u> CGSS <u>F</u> PSNL <u>V</u> Y <u>R</u>  | Carbamidomethyl: 6     | gi 999000030                                           | KAP 13.1 (tentative) cs39 [Ovis aries]                                                                                                                                                                                                    |
| SQQE <u>P</u> LV <u>C</u> PNYQ <u>S</u> Y <u>F</u> R | Carbamidomethyl: 9     | gi 312283590; gi 164652864; gi 426238003; gi 999000014 | keratin 33B [Ovis aries]    keratin 31 [Ovis aries]    PREDICTED: keratin 34 [Ovis aries]    IFP Type I K33a var1 (tentative) cs39 [Ovis aries]                                                                                           |
| DLNMD <u>C</u> VVA <u>E</u> IK                       | Carbamidomethyl: 6     | gi 246276                                              | type II intermediate-filament protein component 5 [sheep, wool, Peptide, 503 aa]                                                                                                                                                          |
| DLNMD <u>C</u> IVAE <u>I</u> K                       | Carbamidomethyl: 6     | gi 312283588                                           | keratin 83 [Ovis aries]                                                                                                                                                                                                                   |
| SDLEAQVESLKEEL <u>I</u> CL <u>K</u>                  | Carbamidomethyl: 16    | gi 312283590; gi 164652864                             | keratin 33B [Ovis aries]    keratin 31 [Ovis aries]                                                                                                                                                                                       |
| SDLEAQVESLKEELL <u>C</u> CL <u>K</u>                 | Carbamidomethyl: 16    | gi 426238003                                           | PREDICTED: keratin 34 [Ovis aries]                                                                                                                                                                                                        |
| Y <u>S</u> Q <u>L</u> NQVQSLIVSVESQLAE <u>I</u> R    | Carbamidomethyl: 3     | gi 999000014                                           | IFP Type I K33a var1 (tentative) cs39 [Ovis aries]                                                                                                                                                                                        |
|                                                      |                        |                                                        |                                                                                                                                                                                                                                           |
| <b>Control 7</b>                                     |                        |                                                        |                                                                                                                                                                                                                                           |
| <b>Sequence</b>                                      | <b>Modifications</b>   | <b>Accessions</b>                                      | <b>Proteins</b>                                                                                                                                                                                                                           |
| PT <u>S</u> Q <u>P</u> AP <u>C</u> R                 | Carbamidomethyl: 4, 9  | gi 999000041                                           | KAP 2.3 var2 (tentative) cs39 [Ovis aries]                                                                                                                                                                                                |
| PT <u>S</u> Q <u>P</u> AP <u>C</u> R                 | Carbamidomethyl: 4     | gi 999000041                                           | KAP 2.3 var2 (tentative) cs39 [Ovis aries]                                                                                                                                                                                                |

|                   |                        |                                                              |                                                                                                                                                                                                                                           |
|-------------------|------------------------|--------------------------------------------------------------|-------------------------------------------------------------------------------------------------------------------------------------------------------------------------------------------------------------------------------------------|
| PTSCQPAPCR        | Carbamidomethyl: 9     | gi 999000041                                                 | KAP 2.3 var2 (tentative) cs39 [Ovis aries]                                                                                                                                                                                                |
| TYQQSCVSSCR       | Carbamidomethyl: 10    | gi 999000018                                                 | KAP 11.1 (tentative) cs39 [Ovis aries]                                                                                                                                                                                                    |
| TGPATTI_CSSDK     | Carbamidomethyl: 8     | gi 229307                                                    | keratin SCMKIIIIB2                                                                                                                                                                                                                        |
| LGCGSGFR          | Carbamidomethyl: 3     | gi 999000015                                                 | KAP 19.5 (tentative) cs39 [Ovis aries]                                                                                                                                                                                                    |
| SVSALGSCGPR       | Carbamidomethyl: 8     | gi 246276                                                    | type II intermediate-filament protein component 5 [sheep, wool, Peptide, 503 aa]                                                                                                                                                          |
| TFSSCSAVAPK       | Carbamidomethyl: 5     | gi 246276                                                    | type II intermediate-filament protein component 5 [sheep, wool, Peptide, 503 aa]                                                                                                                                                          |
| DVD_CAYVR         | Carbamidomethyl: 4     | gi 312283588                                                 | keratin 83 [Ovis aries]                                                                                                                                                                                                                   |
| SLCGSGYGYGSR      | Carbamidomethyl: 3     | gi 999000021                                                 | KAP 6.1 (tentative) cs39 [Ovis aries]                                                                                                                                                                                                     |
| VGGSilGCK         | Carbamidomethyl: 8     | gi 312283584                                                 | hair keratin type II intermediate filament [Ovis aries]                                                                                                                                                                                   |
| CCITAAPYR         | Carbamidomethyl: 1, 2  | gi 312283584; gi 312283588; gi 1308                          | hair keratin type II intermediate filament [Ovis aries]    keratin 83 [Ovis aries]    hair type II keratin intermediate filament protein [Ovis aries]                                                                                     |
| CCITAAPYR         | Carbamidomethyl: 2     | gi 312283584; gi 312283588; gi 1308                          | hair keratin type II intermediate filament [Ovis aries]    keratin 83 [Ovis aries]    hair type II keratin intermediate filament protein [Ovis aries]                                                                                     |
| LECEINTYR         | Carbamidomethyl: 3     | gi 999000013; gi 999000014                                   | IFP Type I K31 var1 (tentative) cs39 [Ovis aries]    IFP Type I K33a var1 (tentative) cs39 [Ovis aries]                                                                                                                                   |
| TQTVVSSPCQTSCYRPR | Carbamidomethyl: 13    | gi 999000030; gi 426217167                                   | KAP 13.1 (tentative) cs39 [Ovis aries]    PREDICTED: keratin-associated protein 13-1-like [Ovis aries]                                                                                                                                    |
| DVD_CAYLR         | Carbamidomethyl: 4     | gi 312283584; gi 246276; gi 1308; gi 164652870               | hair keratin type II intermediate filament [Ovis aries]    type II intermediate-filament protein component 5 [sheep, wool, Peptide, 503 aa]    hair type II keratin intermediate filament protein [Ovis aries]    keratin 85 [Ovis aries] |
| GGVACGGLTYSSTAGR  | Carbamidomethyl: 5     | gi 246276; gi 164652870                                      | type II intermediate-filament protein component 5 [sheep, wool, Peptide, 503 aa]    keratin 85 [Ovis aries]                                                                                                                               |
| LGCGYG_CGYGYGSR   | Carbamidomethyl: 3, 7  | gi 999000021                                                 | KAP 6.1 (tentative) cs39 [Ovis aries]                                                                                                                                                                                                     |
| LPSNPCATTNASSNFCR | Carbamidomethyl: 6, 16 | gi 426238003                                                 | PREDICTED: keratin 34 [Ovis aries]                                                                                                                                                                                                        |
| LGCGYG_CGYGYGSR   | Carbamidomethyl: 7     | gi 999000021                                                 | KAP 6.1 (tentative) cs39 [Ovis aries]                                                                                                                                                                                                     |
| QDMA_CLLK         | Carbamidomethyl: 5     | gi 312283584; gi 246276; gi 312283588; gi 1308; gi 164652870 | hair keratin type II intermediate filament [Ovis aries]    type II intermediate-filament protein component 5 [sheep, wool, Peptide, 503 aa]    keratin 83 [Ovis aries]    hair type II keratin                                            |

|                          |                     |                                                        |                                                                                                                                                                                |
|--------------------------|---------------------|--------------------------------------------------------|--------------------------------------------------------------------------------------------------------------------------------------------------------------------------------|
|                          |                     |                                                        | intermediate filament protein [Ovis aries]    keratin 85 [Ovis aries]                                                                                                          |
| T_CGFSTVSGFGSR           | Carbamidomethyl: 2  | gi 312283588                                           | keratin 83 [Ovis aries]                                                                                                                                                        |
| L_CEGVGSVNVCVSSSR        | Carbamidomethyl: 2  | gi 246276; gi 1308; gi 164652870                       | type II intermediate-filament protein component 5 [sheep, wool, Peptide, 503 aa]    hair type II keratin intermediate filament protein [Ovis aries]    keratin 85 [Ovis aries] |
| L_CEGVGAVNVCVSSSR        | Carbamidomethyl: 2  | gi 312283584; gi 312283588                             | hair keratin type II intermediate filament [Ovis aries]    keratin 83 [Ovis aries]                                                                                             |
| AVPAFSCVSA_CGPR          | Carbamidomethyl: 11 | gi 312283584                                           | hair keratin type II intermediate filament [Ovis aries]                                                                                                                        |
| ILDELT_CK                | Carbamidomethyl: 8  | gi 312283590; gi 999000013; gi 426238003; gi 999000014 | keratin 33B [Ovis aries]    IFP Type I K31 var1 (tentative) cs39 [Ovis aries]    PREDICTED: keratin 34 [Ovis aries]    IFP Type I K33a var1 (tentative) cs39 [Ovis aries]      |
| YSGSS_CGSSFPSNLVYR       | Carbamidomethyl: 6  | gi 999000030                                           | KAP 13.1 (tentative) cs39 [Ovis aries]                                                                                                                                         |
| SGQSLSFQPT_CGSGFY        | Carbamidomethyl: 11 | gi 999000030; gi 426217167                             | KAP 13.1 (tentative) cs39 [Ovis aries]    PREDICTED: keratin-associated protein 13-1-like [Ovis aries]                                                                         |
| DLNMD_CVVAEIK            | Carbamidomethyl: 6  | gi 246276; gi 164652870                                | type II intermediate-filament protein component 5 [sheep, wool, Peptide, 503 aa]    keratin 85 [Ovis aries]                                                                    |
| PLTFISSG_CQPLSGVSTVCKPVR | Carbamidomethyl: 9  | gi 999000018                                           | KAP 11.1 (tentative) cs39 [Ovis aries]                                                                                                                                         |
| DLNMD_CIVAEIK            | Carbamidomethyl: 6  | gi 312283588                                           | keratin 83 [Ovis aries]                                                                                                                                                        |
| SDLEAQVESLKEELI_CLK      | Carbamidomethyl: 16 | gi 312283590; gi 999000013                             | keratin 33B [Ovis aries]    IFP Type I K31 var1 (tentative) cs39 [Ovis aries]                                                                                                  |
| SDLEAQVESLKEELL_CLK      | Carbamidomethyl: 16 | gi 426238003                                           | PREDICTED: keratin 34 [Ovis aries]                                                                                                                                             |
| Q_CCESNLEPLFSGYIETLR     | Carbamidomethyl: 2  | gi 312283584; gi 1308                                  | hair keratin type II intermediate filament [Ovis aries]    hair type II keratin intermediate filament protein [Ovis aries]                                                     |

## Supplementary Table 2. Sample 1a

### Supplementary Table 2

| Sample 1a 25% stretch -1 |                    |            |                                                            |
|--------------------------|--------------------|------------|------------------------------------------------------------|
| Sequence                 | Modifications      | Accessions | Proteins                                                   |
| ASSFSC_GSSR              | Carbamidomethyl: 6 | gi 125117  | RecName: Full=Keratin, type II microfibrillar, component 5 |

|                   |                        |                            |                                                                                                       |
|-------------------|------------------------|----------------------------|-------------------------------------------------------------------------------------------------------|
| GCGGGSFR          | Carbamidomethyl: 2, 4  | gi 999000015               | KAP 19.5 (tentative) cs39 [Ovis aries]                                                                |
| TYQQSCVSSCR       | Carbamidomethyl: 6, 10 | gi 999000018               | KAP 11.1 (tentative) cs39 [Ovis aries]                                                                |
| SVCGGFR           | Carbamidomethyl: 3     | gi 312283584; gi 312283588 | hair keratin type II intermediate filament [Ovis aries]    keratin 83 [Ovis aries]                    |
| TFRTSPCC          | Carbamidomethyl: 7, 8  | gi 999000042               | KAP 2.3 var3 (tentative) cs39 [Ovis aries]                                                            |
| TGPATTI_CSSDK     | Carbamidomethyl: 8     | gi 229307                  | keratin SCMKIIB2                                                                                      |
| LGCGSGFR          | Carbamidomethyl: 3     | gi 999000015               | KAP 19.5 (tentative) cs39 [Ovis aries]                                                                |
| VGGSILGCKK        | Carbamidomethyl: 8     | gi 312283584               | hair keratin type II intermediate filament [Ovis aries]                                               |
| CGPCNSYVR         | Carbamidomethyl: 1, 4  | gi 125090                  | RecName: Full=Keratin, type I microfibrillar 48 kDa, component 8C-1; AltName: Full=Low-sulfur keratin |
| SRFGPCNTSGC       | Carbamidomethyl: 6, 11 | gi 312283590               | keratin 33B [Ovis aries]                                                                              |
| SVSALGSCGPR       | Carbamidomethyl: 8     | gi 125117                  | RecName: Full=Keratin, type II microfibrillar, component 5                                            |
| TFSSCSAVAPK       | Carbamidomethyl: 5     | gi 125117                  | RecName: Full=Keratin, type II microfibrillar, component 5                                            |
| SLCGSGYGYGSR      | Carbamidomethyl: 3     | gi 999000021               | KAP 6.1 (tentative) cs39 [Ovis aries]                                                                 |
| CCISAAPYR         | Carbamidomethyl: 1, 2  | gi 125117                  | RecName: Full=Keratin, type II microfibrillar, component 5                                            |
| VGGSILGCK         | Carbamidomethyl: 8     | gi 312283584               | hair keratin type II intermediate filament [Ovis aries]                                               |
| AFSCVSACGPRPGR    | Carbamidomethyl: 4, 8  | gi 312283584; gi 312283588 | hair keratin type II intermediate filament [Ovis aries]    keratin 83 [Ovis aries]                    |
| CCITAAPYR         | Carbamidomethyl: 1, 2  | gi 312283584; gi 312283588 | hair keratin type II intermediate filament [Ovis aries]    keratin 83 [Ovis aries]                    |
| TQTVVSSPCQTSYRPR  | Carbamidomethyl: 9, 13 | gi 999000030               | KAP 13.1 (tentative) cs39 [Ovis aries]                                                                |
| LECEINTYR         | Carbamidomethyl: 3     | gi 125090                  | RecName: Full=Keratin, type I microfibrillar 48 kDa, component 8C-1; AltName: Full=Low-sulfur keratin |
| TGPATTI_CSSDKFCR  | Carbamidomethyl: 8, 14 | gi 229307                  | keratin SCMKIIB2                                                                                      |
| GGVACGGLTYSSTAGR  | Carbamidomethyl: 5     | gi 125117                  | RecName: Full=Keratin, type II microfibrillar, component 5                                            |
| LGCGYGCGYGYGSR    | Carbamidomethyl: 3, 7  | gi 999000021               | KAP 6.1 (tentative) cs39 [Ovis aries]                                                                 |
| TCGFSTVGSFGSR     | Carbamidomethyl: 2     | gi 312283588               | keratin 83 [Ovis aries]                                                                               |
| AVPAFSCVSACGPRPGR | Carbamidomethyl: 7, 11 | gi 312283584               | hair keratin type II intermediate filament [Ovis aries]                                               |

|                                 |                                |                            |                                                                                                       |
|---------------------------------|--------------------------------|----------------------------|-------------------------------------------------------------------------------------------------------|
| LCEGVGAVNVCVSSSR                | Carbamidomethyl: 2, 11         | gi 312283584; gi 312283588 | hair keratin type II intermediate filament [Ovis aries]    keratin 83 [Ovis aries]                    |
| SISTVCQPVGGVSTICQPTCGVSR        | Carbamidomethyl: 6, 16, 20     | gi 999000018               | KAP 11.1 (tentative) cs39 [Ovis aries]                                                                |
| YSGSSCGSSFFSNLVYR               | Carbamidomethyl: 6             | gi 999000030               | KAP 13.1 (tentative) cs39 [Ovis aries]                                                                |
| TITPCISSPCAPAAPCTPCVPR          | Carbamidomethyl: 5, 10, 16, 19 | gi 125090                  | RecName: Full=Keratin, type I microfibrillar 48 kDa, component 8C-1; AltName: Full=Low-sulfur keratin |
| SGQSLSFQPTCGSGFY                | Carbamidomethyl: 11            | gi 999000030               | KAP 13.1 (tentative) cs39 [Ovis aries]                                                                |
|                                 |                                |                            |                                                                                                       |
| <b>Sample 1a 25% stretch -2</b> |                                |                            |                                                                                                       |
| <b>Sequence</b>                 | <b>Modifications</b>           | <b>Accessions</b>          | <b>Proteins</b>                                                                                       |
| EAECAEADSGR                     | Carbamidomethyl: 4             | gi 312283584               | hair keratin type II intermediate filament [Ovis aries]                                               |
| SSSCSSLSSGSR                    | Carbamidomethyl: 4             | gi 999000017               | KAP 13.1 var1 (tentative) cs39 [Ovis aries]                                                           |
| ASSFSCGSSR                      | Carbamidomethyl: 6             | gi 125117                  | RecName: Full=Keratin, type II microfibrillar, component 5                                            |
| GCGCGSFR                        | Carbamidomethyl: 2, 4          | gi 999000015; gi 999000016 | KAP 19.5 (tentative) cs39 [Ovis aries]    KAP 19.3 (tentative) cs39 [Ovis aries]                      |
| CPSSFGR                         | Carbamidomethyl: 1             | gi 999000016               | KAP 19.3 (tentative) cs39 [Ovis aries]                                                                |
| TYQQSCVSSCR                     | Carbamidomethyl: 6, 10         | gi 999000018               | KAP 11.1 (tentative) cs39 [Ovis aries]                                                                |
| SVCGGFR                         | Carbamidomethyl: 3             | gi 312283584; gi 312283588 | hair keratin type II intermediate filament [Ovis aries]    keratin 83 [Ovis aries]                    |
| TYQQSCVSSCR                     | Carbamidomethyl: 6, 10         | gi 999000018               | KAP 11.1 (tentative) cs39 [Ovis aries]                                                                |
| SRCGPCNSYVR                     | Carbamidomethyl: 3, 6          | gi 57164221                | keratin, type I microfibrillar 48 kDa, component 8C-1 [Ovis aries]                                    |
| VGGSILGCKK                      | Carbamidomethyl: 8             | gi 312283584               | hair keratin type II intermediate filament [Ovis aries]                                               |
| CGPCNSYVR                       | Carbamidomethyl: 1, 4          | gi 57164221                | keratin, type I microfibrillar 48 kDa, component 8C-1 [Ovis aries]                                    |
| LGCSSGFR                        | Carbamidomethyl: 3             | gi 999000015               | KAP 19.5 (tentative) cs39 [Ovis aries]                                                                |
| TGPATTICSSDK                    | Carbamidomethyl: 8             | gi 229307                  | keratin SCMKIIIIB2                                                                                    |
| SRFGPCNTSGC                     | Carbamidomethyl: 6, 11         | gi 312283590               | keratin 33B [Ovis aries]                                                                              |
| TRCGPCNTFVH                     | Carbamidomethyl: 3, 6          | gi 125091                  | RecName: Full=Keratin, type I microfibrillar, 47.6 kDa; AltName: Full=Low-sulfur keratin              |
| SVSALGSCGPR                     | Carbamidomethyl: 8             | gi 125117                  | RecName: Full=Keratin, type II microfibrillar, component 5                                            |

|                            |                                |                            |                                                                                                                       |
|----------------------------|--------------------------------|----------------------------|-----------------------------------------------------------------------------------------------------------------------|
| TFSSCSAVAPK                | Carbamidomethyl: 5             | gi 125117                  | RecName: Full=Keratin, type II microfibrillar, component 5                                                            |
| SLCGSGYGYGSR               | Carbamidomethyl: 3             | gi 999000021               | KAP 6.1 (tentative) cs39 [Ovis aries]                                                                                 |
| AFSCVSACGPRPGR             | Carbamidomethyl: 4, 8          | gi 312283584; gi 312283588 | hair keratin type II intermediate filament [Ovis aries]    keratin 83 [Ovis aries]                                    |
| CCISAAPYR                  | Carbamidomethyl: 1, 2          | gi 125117                  | RecName: Full=Keratin, type II microfibrillar, component 5                                                            |
| VGGSilGCK                  | Carbamidomethyl: 8             | gi 312283584               | hair keratin type II intermediate filament [Ovis aries]                                                               |
| CGPCNTFVH                  | Carbamidomethyl: 1, 4          | gi 125091                  | RecName: Full=Keratin, type I microfibrillar, 47.6 kDa; AltName: Full=Low-sulfur keratin                              |
| CCITAAPYR                  | Carbamidomethyl: 1, 2          | gi 312283584; gi 312283588 | hair keratin type II intermediate filament [Ovis aries]    keratin 83 [Ovis aries]                                    |
| TQTVVSSPCQTSYRPR           | Carbamidomethyl: 9, 13         | gi 999000030               | KAP 13.1 (tentative) cs39 [Ovis aries]                                                                                |
| TGPATTICSSDKFCR            | Carbamidomethyl: 8, 14         | gi 229307                  | keratin SCMKIIB2                                                                                                      |
| GGVACGGLTYSSTAGR           | Carbamidomethyl: 5             | gi 125117                  | RecName: Full=Keratin, type II microfibrillar, component 5                                                            |
| DVDCAYLRL                  | Carbamidomethyl: 4             | gi 312283584; gi 125117    | hair keratin type II intermediate filament [Ovis aries]    RecName: Full=Keratin, type II microfibrillar, component 5 |
| LGCGYGCGYGYGSR             | Carbamidomethyl: 3, 7          | gi 999000021               | KAP 6.1 (tentative) cs39 [Ovis aries]                                                                                 |
| TGPATTICSSDKF              | Carbamidomethyl: 8             | gi 229307                  | keratin SCMKIIB2                                                                                                      |
| TCGFSTVSGGFGSR             | Carbamidomethyl: 2             | gi 312283588               | keratin 83 [Ovis aries]                                                                                               |
| AVPAFSCVSACGPRPGR          | Carbamidomethyl: 7, 11         | gi 312283584               | hair keratin type II intermediate filament [Ovis aries]                                                               |
| LCEGVGAVNVCVSSSR           | Carbamidomethyl: 2, 11         | gi 312283584; gi 312283588 | hair keratin type II intermediate filament [Ovis aries]    keratin 83 [Ovis aries]                                    |
| SISTVCQPVGGVSTICQPTCGVSR   | Carbamidomethyl: 6, 16, 20     | gi 999000018               | KAP 11.1 (tentative) cs39 [Ovis aries]                                                                                |
| YSGSSCGSSFPNLVYR           | Carbamidomethyl: 6             | gi 999000030               | KAP 13.1 (tentative) cs39 [Ovis aries]                                                                                |
| TITPCISSPCAPAAPCTPCVPR     | Carbamidomethyl: 5, 10, 16, 19 | gi 57164221                | keratin, type I microfibrillar 48 kDa, component 8C-1 [Ovis aries]                                                    |
| SGQSLSFQPTCGSGFY           | Carbamidomethyl: 11            | gi 999000030               | KAP 13.1 (tentative) cs39 [Ovis aries]                                                                                |
| SQQQEPLLCPNYQSYFR          | Carbamidomethyl: 9             | gi 309323371               | keratin 34 [Ovis aries]                                                                                               |
| QCCESNLEPLFSGYIETLRR       | Carbamidomethyl: 2, 3          | gi 312283584               | hair keratin type II intermediate filament [Ovis aries]                                                               |
| LGYGICGFPVLSSGSGFCQPTFFASR | Carbamidomethyl: 6, 18         | gi 999000017               | KAP 13.1 var1 (tentative) cs39 [Ovis aries]                                                                           |
|                            |                                |                            |                                                                                                                       |

| <b>Sample 1a 25% stretch -3</b> |                                 |                            |                                                                                    |
|---------------------------------|---------------------------------|----------------------------|------------------------------------------------------------------------------------|
| <b>Sequence</b>                 | <b>Modifications</b>            | <b>Accessions</b>          | <b>Proteins</b>                                                                    |
| SSSCSSLSGSR                     | Carbamidomethyl: 4              | gi 999000017               | KAP 13.1 var1 (tentative) cs39 [Ovis aries]                                        |
| ASSFSCGSSR                      | Carbamidomethyl: 6              | gi 246276                  | type II intermediate-filament protein component 5 [sheep, wool, Peptide, 503 aa]   |
| GCGCGSFR                        | Carbamidomethyl: 2, 4           | gi 999000015               | KAP 19.5 (tentative) cs39 [Ovis aries]                                             |
| SRCGPCNSVVR                     | Carbamidomethyl: 3, 6           | gi 999000013               | IFP Type I K31 var1 (tentative) cs39 [Ovis aries]                                  |
| VSSCCGSVCSDQSCGR                | Carbamidomethyl: 4, 5, 9, 14    | gi 426237981               | PREDICTED: keratin-associated protein 4-8-like isoform 2 [Ovis aries]              |
| TYQSCVSSCR                      | Carbamidomethyl: 6, 10          | gi 999000018               | KAP 11.1 (tentative) cs39 [Ovis aries]                                             |
| TGPATTICSSDK                    | Carbamidomethyl: 8              | gi 229307                  | keratin SCMKIIB2                                                                   |
| CGPCNSVVR                       | Carbamidomethyl: 1, 4           | gi 999000013               | IFP Type I K31 var1 (tentative) cs39 [Ovis aries]                                  |
| CCQSVCCQSPCR                    | Carbamidomethyl: 1, 2, 6, 7, 11 | gi 426237981               | PREDICTED: keratin-associated protein 4-8-like isoform 2 [Ovis aries]              |
| VGGSILGCK                       | Carbamidomethyl: 8              | gi 312283584               | hair keratin type II intermediate filament [Ovis aries]                            |
| LGCGSGFR                        | Carbamidomethyl: 3              | gi 999000015               | KAP 19.5 (tentative) cs39 [Ovis aries]                                             |
| SRFGPCNTSGC                     | Carbamidomethyl: 6, 11          | gi 312283590               | keratin 33B [Ovis aries]                                                           |
| SVSALGSCGPR                     | Carbamidomethyl: 8              | gi 246276                  | type II intermediate-filament protein component 5 [sheep, wool, Peptide, 503 aa]   |
| TFSSCSAVAPK                     | Carbamidomethyl: 5              | gi 246276                  | type II intermediate-filament protein component 5 [sheep, wool, Peptide, 503 aa]   |
| SLGSGYGYGSR                     | Carbamidomethyl: 3              | gi 999000021               | KAP 6.1 (tentative) cs39 [Ovis aries]                                              |
| CCISAAPYR                       | Carbamidomethyl: 1, 2           | gi 246276                  | type II intermediate-filament protein component 5 [sheep, wool, Peptide, 503 aa]   |
| VGGSILGCK                       | Carbamidomethyl: 8              | gi 312283584               | hair keratin type II intermediate filament [Ovis aries]                            |
| AFSCVSA CGPRPGR                 | Carbamidomethyl: 4, 8           | gi 312283584; gi 312283588 | hair keratin type II intermediate filament [Ovis aries]    keratin 83 [Ovis aries] |
| TQTVVSSPCQTSCYRPR               | Carbamidomethyl: 9, 13          | gi 999000030               | KAP 13.1 (tentative) cs39 [Ovis aries]                                             |
| CCITAAPYR                       | Carbamidomethyl: 1, 2           | gi 312283584; gi 312283588 | hair keratin type II intermediate filament [Ovis aries]    keratin 83 [Ovis aries] |
| TGPATTICSSDKFCR                 | Carbamidomethyl: 8, 14          | gi 229307                  | keratin SCMKIIB2                                                                   |
| GGVACGGLTYSSTAGR                | Carbamidomethyl: 5              | gi 246276                  | type II intermediate-filament protein component 5 [sheep, wool, Peptide, 503 aa]   |
| LGCGYCGYGYGSR                   | Carbamidomethyl: 3, 7           | gi 999000021               | KAP 6.1 (tentative) cs39 [Ovis aries]                                              |

|                                                                                                                                                |                                |                            |                                                                                                       |
|------------------------------------------------------------------------------------------------------------------------------------------------|--------------------------------|----------------------------|-------------------------------------------------------------------------------------------------------|
| T <u>C</u> G <u>F</u> S <u>T</u> V <u>G</u> S <u>G</u> F <u>G</u> S <u>R</u>                                                                   | Carbamidomethyl: 2             | gi 312283588               | keratin 83 [Ovis aries]                                                                               |
| AVPA <u>F</u> S <u>C</u> V <u>S</u> A <u>C</u> G <u>P</u> R <u>P</u> G <u>R</u>                                                                | Carbamidomethyl: 7, 11         | gi 312283584               | hair keratin type II intermediate filament [Ovis aries]                                               |
| L <u>C</u> E <u>G</u> V <u>G</u> A <u>V</u> N <u>V</u> <u>C</u> V <u>S</u> S <u>S</u> R                                                        | Carbamidomethyl: 2, 11         | gi 312283584; gi 312283588 | hair keratin type II intermediate filament [Ovis aries]   keratin 83 [Ovis aries]                     |
| S <u>I</u> S <u>T</u> V <u>C</u> Q <u>P</u> V <u>G</u> G <u>V</u> S <u>T</u> I <u>C</u> Q <u>P</u> T <u>C</u> G <u>V</u> S <u>R</u>            | Carbamidomethyl: 6, 16, 20     | gi 999000018               | KAP 11.1 (tentative) cs39 [Ovis aries]                                                                |
| Y <u>S</u> G <u>S</u> S <u>C</u> G <u>S</u> S <u>F</u> P <u>S</u> N <u>L</u> V <u>Y</u> R                                                      | Carbamidomethyl: 6             | gi 999000030               | KAP 13.1 (tentative) cs39 [Ovis aries]                                                                |
| T <u>I</u> T <u>P</u> <u>C</u> I <u>S</u> S <u>P</u> <u>C</u> A <u>P</u> A <u>A</u> P <u>C</u> T <u>P</u> <u>C</u> V <u>P</u> R                | Carbamidomethyl: 5, 10, 16, 19 | gi 999000013               | IFP Type I K31 var1 (tentative) cs39 [Ovis aries]                                                     |
| S <u>G</u> Q <u>S</u> L <u>S</u> F <u>Q</u> P <u>T</u> <u>C</u> G <u>S</u> G <u>F</u> Y                                                        | Carbamidomethyl: 11            | gi 999000030               | KAP 13.1 (tentative) cs39 [Ovis aries]                                                                |
| L <u>G</u> Y <u>G</u> I <u>C</u> G <u>F</u> P <u>V</u> L <u>S</u> S <u>G</u> S <u>G</u> F <u>C</u> Q <u>P</u> T <u>F</u> F <u>A</u> S <u>R</u> | Carbamidomethyl: 6, 18         | gi 999000017               | KAP 13.1 var1 (tentative) cs39 [Ovis aries]                                                           |
|                                                                                                                                                |                                |                            |                                                                                                       |
| <b>Sample 1a 25% stretch -4</b>                                                                                                                |                                |                            |                                                                                                       |
| <b>Sequence</b>                                                                                                                                | <b>Modifications</b>           | <b>Accessions</b>          | <b>Proteins</b>                                                                                       |
| E <u>A</u> E <u>C</u> A <u>E</u> A <u>D</u> S <u>G</u> R                                                                                       | Carbamidomethyl: 4             | gi 312283584               | hair keratin type II intermediate filament [Ovis aries]                                               |
| S <u>S</u> S <u>C</u> S <u>S</u> L <u>S</u> S <u>G</u> S <u>R</u>                                                                              | Carbamidomethyl: 4             | gi 999000017               | KAP 13.1 var1 (tentative) cs39 [Ovis aries]                                                           |
| A <u>S</u> S <u>F</u> S <u>C</u> G <u>S</u> S <u>R</u>                                                                                         | Carbamidomethyl: 6             | gi 125117                  | RecName: Full=Keratin, type II microfibrillar, component 5                                            |
| G <u>C</u> G <u>C</u> G <u>S</u> F <u>R</u>                                                                                                    | Carbamidomethyl: 2, 4          | gi 999000015               | KAP 19.5 (tentative) cs39 [Ovis aries]                                                                |
| T <u>Y</u> Q <u>Q</u> S <u>C</u> V <u>S</u> S <u>C</u> R                                                                                       | Carbamidomethyl: 6, 10         | gi 328905561               | keratin-associated protein KAP11-1 [Ovis aries]                                                       |
| R <u>L</u> G <u>C</u> G <u>S</u> G <u>F</u> R                                                                                                  | Carbamidomethyl: 4             | gi 999000015               | KAP 19.5 (tentative) cs39 [Ovis aries]                                                                |
| S <u>V</u> C <u>G</u> G <u>F</u> R                                                                                                             | Carbamidomethyl: 3             | gi 312283584; gi 312283588 | hair keratin type II intermediate filament [Ovis aries]   keratin 83 [Ovis aries]                     |
| T <u>F</u> R <u>T</u> S <u>P</u> <u>C</u> <u>C</u>                                                                                             | Carbamidomethyl: 7, 8          | gi 999000042               | KAP 2.3 var3 (tentative) cs39 [Ovis aries]                                                            |
| V <u>G</u> G <u>S</u> I <u>L</u> G <u>C</u> K <u>K</u>                                                                                         | Carbamidomethyl: 8             | gi 312283584               | hair keratin type II intermediate filament [Ovis aries]                                               |
| <u>C</u> G <u>P</u> <u>C</u> N <u>S</u> Y <u>V</u> R                                                                                           | Carbamidomethyl: 1, 4          | gi 125090                  | RecName: Full=Keratin, type I microfibrillar 48 kDa, component 8C-1; AltName: Full=Low-sulfur keratin |
| T <u>G</u> P <u>A</u> T <u>T</u> I <u>C</u> S <u>S</u> D <u>K</u>                                                                              | Carbamidomethyl: 8             | gi 999000024               | KAP 3.2 (tentative) cs39 [Ovis aries]                                                                 |
| L <u>G</u> <u>C</u> G <u>S</u> G <u>F</u> R                                                                                                    | Carbamidomethyl: 3             | gi 999000015               | KAP 19.5 (tentative) cs39 [Ovis aries]                                                                |
| S <u>R</u> F <u>G</u> P <u>C</u> N <u>T</u> S <u>G</u> <u>C</u>                                                                                | Carbamidomethyl: 6, 11         | gi 312283590               | keratin 33B [Ovis aries]                                                                              |
| S <u>V</u> S <u>A</u> L <u>G</u> S <u>C</u> G <u>P</u> R                                                                                       | Carbamidomethyl: 8             | gi 125117                  | RecName: Full=Keratin, type II microfibrillar, component 5                                            |



|                             |                                |                            |                                                                                                                                                             |
|-----------------------------|--------------------------------|----------------------------|-------------------------------------------------------------------------------------------------------------------------------------------------------------|
| TFSSCSAVAPK                 | Carbamidomethyl: 5             | gi 125117                  | RecName: Full=Keratin, type II microfibrillar, component 5                                                                                                  |
| SLCGSGYGYGSR                | Carbamidomethyl: 3             | gi 999000021               | KAP 6.1 (tentative) cs39 [Ovis aries]                                                                                                                       |
| CGPCNTFVH                   | Carbamidomethyl: 1, 4          | gi 999000014               | IFP Type I K33a var1 (tentative) cs39 [Ovis aries]                                                                                                          |
| AFSCVSACGPRPGR              | Carbamidomethyl: 4, 8          | gi 312283584; gi 312283588 | hair keratin type II intermediate filament [Ovis aries]    keratin 83 [Ovis aries]                                                                          |
| CCISAAPYR                   | Carbamidomethyl: 1, 2          | gi 125117                  | RecName: Full=Keratin, type II microfibrillar, component 5                                                                                                  |
| TQTVVSSPQCTSCYRPR           | Carbamidomethyl: 9, 13         | gi 999000030               | KAP 13.1 (tentative) cs39 [Ovis aries]                                                                                                                      |
| VGGSILGCK                   | Carbamidomethyl: 8             | gi 312283584               | hair keratin type II intermediate filament [Ovis aries]                                                                                                     |
| CCITAAPYR                   | Carbamidomethyl: 1, 2          | gi 312283584; gi 312283588 | hair keratin type II intermediate filament [Ovis aries]    keratin 83 [Ovis aries]                                                                          |
| LECEINTYR                   | Carbamidomethyl: 3             | gi 125090; gi 999000014    | RecName: Full=Keratin, type I microfibrillar 48 kDa, component 8C-1; AltName: Full=Low-sulfur keratin    IFP Type I K33a var1 (tentative) cs39 [Ovis aries] |
| TGPATTICSSDKFCR             | Carbamidomethyl: 8, 14         | gi 999000024               | KAP 3.2 (tentative) cs39 [Ovis aries]                                                                                                                       |
| GGVACGGLTYSTAGR             | Carbamidomethyl: 5             | gi 125117                  | RecName: Full=Keratin, type II microfibrillar, component 5                                                                                                  |
| LGCGYGCGYGYGSR              | Carbamidomethyl: 3, 7          | gi 999000021               | KAP 6.1 (tentative) cs39 [Ovis aries]                                                                                                                       |
| DVDCAYLR                    | Carbamidomethyl: 4             | gi 312283584; gi 125117    | hair keratin type II intermediate filament [Ovis aries]    RecName: Full=Keratin, type II microfibrillar, component 5                                       |
| VGGSILGCK                   | Propionamide: 8                | gi 312283584               | hair keratin type II intermediate filament [Ovis aries]                                                                                                     |
| TGPATTICSSDKF               | Carbamidomethyl: 8             | gi 999000024               | KAP 3.2 (tentative) cs39 [Ovis aries]                                                                                                                       |
| T_CGFSTVSGSGFGSR            | Carbamidomethyl: 2             | gi 312283588               | keratin 83 [Ovis aries]                                                                                                                                     |
| AVPAFSCVSACGPRPGR           | Carbamidomethyl: 7, 11         | gi 312283584               | hair keratin type II intermediate filament [Ovis aries]                                                                                                     |
| SISTV_CQPVGGVSTI_CQPT_CGVSR | Carbamidomethyl: 6, 16, 20     | gi 328905561               | keratin-associated protein KAP11-1 [Ovis aries]                                                                                                             |
| TGSCCGPTFSSLS_CGGGCLQPR     | Carbamidomethyl: 4, 5, 14, 18  | gi 999000042               | KAP 2.3 var3 (tentative) cs39 [Ovis aries]                                                                                                                  |
| YSGSS_CGSSFPSNLVYR          | Carbamidomethyl: 6             | gi 999000030               | KAP 13.1 (tentative) cs39 [Ovis aries]                                                                                                                      |
| TITP_CISSP_CAPAAP_CTP_CVPR  | Carbamidomethyl: 5, 10, 16, 19 | gi 125090                  | RecName: Full=Keratin, type I microfibrillar 48 kDa, component 8C-1; AltName: Full=Low-sulfur keratin                                                       |
| QIASGPVATGGSSITVLAPDSCQPR   | Carbamidomethyl: 21            | gi 125117                  | RecName: Full=Keratin, type II microfibrillar, component 5                                                                                                  |

|                                 |                        |                            |                                                                                    |
|---------------------------------|------------------------|----------------------------|------------------------------------------------------------------------------------|
| SGQSLSFQPTCGSGFY                | Carbamidomethyl: 11    | gi 999000030               | KAP 13.1 (tentative) cs39 [Ovis aries]                                             |
| DLNMDCVVAEIK                    | Propionamide: 6        | gi 125117                  | RecName: Full=Keratin, type II microfibrillar, component 5                         |
| QCCESNLEPLFSGYIETLRR            | Carbamidomethyl: 2, 3  | gi 312283584               | hair keratin type II intermediate filament [Ovis aries]                            |
| LGYGICGFVPLSSGSGFCQPTFFASR      | Carbamidomethyl: 6, 18 | gi 999000017               | KAP 13.1 var1 (tentative) cs39 [Ovis aries]                                        |
|                                 |                        |                            |                                                                                    |
| <b>Sample 1a 25% stretch -5</b> |                        |                            |                                                                                    |
| <b>Sequence</b>                 | <b>Modifications</b>   | <b>Accessions</b>          | <b>Proteins</b>                                                                    |
| SSSCSSLSGSR                     | Carbamidomethyl: 4     | gi 999000017               | KAP 13.1 var1 (tentative) cs39 [Ovis aries]                                        |
| ASSFSCGSSR                      | Carbamidomethyl: 6     | gi 246276                  | type II intermediate-filament protein component 5 [sheep, wool, Peptide, 503 aa]   |
| GCGCGSFR                        | Carbamidomethyl: 2, 4  | gi 999000015               | KAP 19.5 (tentative) cs39 [Ovis aries]                                             |
| SVCGGFR                         | Carbamidomethyl: 3     | gi 312283584; gi 312283588 | hair keratin type II intermediate filament [Ovis aries]    keratin 83 [Ovis aries] |
| TYQSCVSSCR                      | Carbamidomethyl: 6, 10 | gi 999000018               | KAP 11.1 (tentative) cs39 [Ovis aries]                                             |
| TFRTSPCC                        | Carbamidomethyl: 7, 8  | gi 999000042               | KAP 2.3 var3 (tentative) cs39 [Ovis aries]                                         |
| TGPATTICSSDK                    | Carbamidomethyl: 8     | gi 165917                  | BIIB2 high sulfur keratin [Ovis aries]                                             |
| CGPCNSYVR                       | Carbamidomethyl: 1, 4  | gi 164652864               | keratin 31 [Ovis aries]                                                            |
| LGCGSGFR                        | Carbamidomethyl: 3     | gi 999000015               | KAP 19.5 (tentative) cs39 [Ovis aries]                                             |
| SRFGPCNTSGC                     | Carbamidomethyl: 6, 11 | gi 312283590               | keratin 33B [Ovis aries]                                                           |
| VGGSILGCKK                      | Carbamidomethyl: 8     | gi 312283584               | hair keratin type II intermediate filament [Ovis aries]                            |
| SVSALGSCGPR                     | Carbamidomethyl: 8     | gi 246276                  | type II intermediate-filament protein component 5 [sheep, wool, Peptide, 503 aa]   |
| TFSSCSAVAPK                     | Carbamidomethyl: 5     | gi 246276                  | type II intermediate-filament protein component 5 [sheep, wool, Peptide, 503 aa]   |
| SLCGSGYGYGSR                    | Carbamidomethyl: 3     | gi 999000021               | KAP 6.1 (tentative) cs39 [Ovis aries]                                              |
| CCISAAPYR                       | Carbamidomethyl: 1, 2  | gi 246276                  | type II intermediate-filament protein component 5 [sheep, wool, Peptide, 503 aa]   |
| CGPCNTFVH                       | Carbamidomethyl: 1, 4  | gi 999000014               | IFP Type I K33a var1 (tentative) cs39 [Ovis aries]                                 |
| VGGSILGCK                       | Carbamidomethyl: 8     | gi 312283584               | hair keratin type II intermediate filament [Ovis aries]                            |
| AFSCVSA CGPRPGR                 | Carbamidomethyl: 4, 8  | gi 312283584; gi 312283588 | hair keratin type II intermediate filament [Ovis aries]    keratin 83 [Ovis aries] |

|                              |                                |                            |                                                                                                                                             |
|------------------------------|--------------------------------|----------------------------|---------------------------------------------------------------------------------------------------------------------------------------------|
| CCITAAPYR                    | Carbamidomethyl: 1, 2          | gi 312283584; gi 312283588 | hair keratin type II intermediate filament [Ovis aries]    keratin 83 [Ovis aries]                                                          |
| TGPATTI_CSSDKF_C             | Carbamidomethyl: 8, 14         | gi 165917                  | BIIB2 high sulfur keratin [Ovis aries]                                                                                                      |
| DVD_CAYLR                    | Carbamidomethyl: 4             | gi 312283584; gi 246276    | hair keratin type II intermediate filament [Ovis aries]    type II intermediate-filament protein component 5 [sheep, wool, Peptide, 503 aa] |
| LGGYGC_GYGYGSR               | Carbamidomethyl: 3, 7          | gi 999000021               | KAP 6.1 (tentative) cs39 [Ovis aries]                                                                                                       |
| TGPATTI_CSSDKF               | Carbamidomethyl: 8             | gi 165917                  | BIIB2 high sulfur keratin [Ovis aries]                                                                                                      |
| T_CGFSTVGSFGSR               | Carbamidomethyl: 2             | gi 312283588               | keratin 83 [Ovis aries]                                                                                                                     |
| CCITAAPYRGIS_CYR             | Carbamidomethyl: 1, 2, 13      | gi 312283584; gi 312283588 | hair keratin type II intermediate filament [Ovis aries]    keratin 83 [Ovis aries]                                                          |
| L_CEGVGSVNV_CVSSSR           | Carbamidomethyl: 2, 11         | gi 246276                  | type II intermediate-filament protein component 5 [sheep, wool, Peptide, 503 aa]                                                            |
| AVPAF_CVSACGPRPGR            | Carbamidomethyl: 7, 11         | gi 312283584               | hair keratin type II intermediate filament [Ovis aries]                                                                                     |
| TGSCC_GPTFSSLS_CGGG_C_LQPR   | Carbamidomethyl: 4, 5, 14, 18  | gi 999000042               | KAP 2.3 var3 (tentative) cs39 [Ovis aries]                                                                                                  |
| SISTV_CQPVG_VSTI_CQPT_CGVSR  | Carbamidomethyl: 6, 16, 20     | gi 999000018               | KAP 11.1 (tentative) cs39 [Ovis aries]                                                                                                      |
| TITP_CISSP_CAPAAP_CTP_CVPR   | Carbamidomethyl: 5, 10, 16, 19 | gi 164652864               | keratin 31 [Ovis aries]                                                                                                                     |
| YSGSS_CGSSFP_NLVYR           | Carbamidomethyl: 6             | gi 999000030               | KAP 13.1 (tentative) cs39 [Ovis aries]                                                                                                      |
| QIASGPVATGGSITV_LAPD_S_CQPR  | Carbamidomethyl: 21            | gi 246276                  | type II intermediate-filament protein component 5 [sheep, wool, Peptide, 503 aa]                                                            |
| SGQSL_SFQPT_C_GSGFY          | Carbamidomethyl: 11            | gi 999000030               | KAP 13.1 (tentative) cs39 [Ovis aries]                                                                                                      |
| Q_CCESNLEPLFSGYIETLRR        | Carbamidomethyl: 2, 3          | gi 312283584               | hair keratin type II intermediate filament [Ovis aries]                                                                                     |
| LGYGIC_GFPVLSSGSGF_CQPTFFASR | Carbamidomethyl: 6, 18         | gi 999000017               | KAP 13.1 var1 (tentative) cs39 [Ovis aries]                                                                                                 |

### Supplementary Table 3. Sample 1b

Supplementary Table 3

| Sample 1b stretch to break -1 |                    |              |                                             |
|-------------------------------|--------------------|--------------|---------------------------------------------|
| Sequence                      | Modifications      | Accessions   | Proteins                                    |
| SSS_CSSLSSGSR                 | Carbamidomethyl: 4 | gi 999000017 | KAP 13.1 var1 (tentative) cs39 [Ovis aries] |

|                   |                        |                            |                                                                                    |
|-------------------|------------------------|----------------------------|------------------------------------------------------------------------------------|
| ASSFSCGSSR        | Carbamidomethyl: 6     | gi 246276                  | type II intermediate-filament protein component 5 [sheep, wool, Peptide, 503 aa]   |
| GCGGGSFR          | Carbamidomethyl: 2, 4  | gi 999000015               | KAP 19.5 (tentative) cs39 [Ovis aries]                                             |
| SVCGGFR           | Carbamidomethyl: 3     | gi 312283584; gi 312283588 | hair keratin type II intermediate filament [Ovis aries]    keratin 83 [Ovis aries] |
| TYQQSCVSSCR       | Carbamidomethyl: 6, 10 | gi 999000018               | KAP 11.1 (tentative) cs39 [Ovis aries]                                             |
| SRGPGCNSYVR       | Carbamidomethyl: 3, 6  | gi 164652864               | keratin 31 [Ovis aries]                                                            |
| TFRTSPCC          | Carbamidomethyl: 7, 8  | gi 125644                  | RecName: Full=Keratin, high-sulfur matrix protein, IIIA3 [Ovis aries]              |
| CGPCNSYVR         | Carbamidomethyl: 1, 4  | gi 164652864               | keratin 31 [Ovis aries]                                                            |
| VGGGILGCKK        | Carbamidomethyl: 8     | gi 312283584               | hair keratin type II intermediate filament [Ovis aries]                            |
| LGCGSGFR          | Carbamidomethyl: 3     | gi 999000015               | KAP 19.5 (tentative) cs39 [Ovis aries]                                             |
| SRFGPCNTSGC       | Carbamidomethyl: 6, 11 | gi 312283590               | keratin 33B [Ovis aries]                                                           |
| TFSSCSAVAPK       | Carbamidomethyl: 5     | gi 246276                  | type II intermediate-filament protein component 5 [sheep, wool, Peptide, 503 aa]   |
| SVSALGSCGPR       | Carbamidomethyl: 8     | gi 246276                  | type II intermediate-filament protein component 5 [sheep, wool, Peptide, 503 aa]   |
| SLCGSGYGYGSR      | Carbamidomethyl: 3     | gi 999000021               | KAP 6.1 (tentative) cs39 [Ovis aries]                                              |
| CCISAAPYR         | Carbamidomethyl: 1, 2  | gi 246276                  | type II intermediate-filament protein component 5 [sheep, wool, Peptide, 503 aa]   |
| VGGGILGCK         | Carbamidomethyl: 8     | gi 312283584               | hair keratin type II intermediate filament [Ovis aries]                            |
| AFSCVSACGPRPGR    | Carbamidomethyl: 4, 8  | gi 312283584; gi 312283588 | hair keratin type II intermediate filament [Ovis aries]    keratin 83 [Ovis aries] |
| CCITAAPYR         | Carbamidomethyl: 1, 2  | gi 312283584; gi 312283588 | hair keratin type II intermediate filament [Ovis aries]    keratin 83 [Ovis aries] |
| TQTVVSSPCQTSYRPR  | Carbamidomethyl: 9, 13 | gi 999000030               | KAP 13.1 (tentative) cs39 [Ovis aries]                                             |
| TGPATTICSSDKFCR   | Carbamidomethyl: 8, 14 | gi 229307                  | keratin SCMIIIIB2                                                                  |
| GGVACGGLTYSSTAGR  | Carbamidomethyl: 5     | gi 246276                  | type II intermediate-filament protein component 5 [sheep, wool, Peptide, 503 aa]   |
| LGCGYGCGYGYGSR    | Carbamidomethyl: 3, 7  | gi 999000021               | KAP 6.1 (tentative) cs39 [Ovis aries]                                              |
| AVPAFSCVSACGPRPGR | Carbamidomethyl: 7, 11 | gi 312283584               | hair keratin type II intermediate filament [Ovis aries]                            |
| TGCFSTVSGGFGSR    | Carbamidomethyl: 2     | gi 312283588               | keratin 83 [Ovis aries]                                                            |
| LCEGVGAVNVCVSSSR  | Carbamidomethyl: 2, 11 | gi 312283584; gi 312283588 | hair keratin type II intermediate filament [Ovis aries]    keratin 83 [Ovis aries] |

|                                                            |                                |                            |                                                                                    |
|------------------------------------------------------------|--------------------------------|----------------------------|------------------------------------------------------------------------------------|
| SISTV <u>C</u> QPVGGVSTI <u>C</u> QPT <u>C</u> GVSR        | Carbamidomethyl: 6, 16, 20     | gi 999000018               | KAP 11.1 (tentative) cs39 [Ovis aries]                                             |
| ILDELTL <u>L</u> CK                                        | Carbamidomethyl: 8             | gi 164652864; gi 312283590 | keratin 31 [Ovis aries]    keratin 33B [Ovis aries]                                |
| TG <u>S</u> CCGPTFSSLS <u>C</u> GGG <u>L</u> QPR           | Carbamidomethyl: 4, 5, 14, 18  | gi 125644                  | RecName: Full=Keratin, high-sulfur matrix protein, IIIA3 [Ovis aries]              |
| YSGSS <u>C</u> GSFFPSNLVYR                                 | Carbamidomethyl: 6             | gi 999000030               | KAP 13.1 (tentative) cs39 [Ovis aries]                                             |
| TITP <u>C</u> ISSP <u>C</u> APAAP <u>C</u> TP <u>C</u> VPR | Carbamidomethyl: 5, 10, 16, 19 | gi 164652864               | keratin 31 [Ovis aries]                                                            |
| SGQSLSFQPT <u>C</u> SGGFY                                  | Carbamidomethyl: 11            | gi 999000030               | KAP 13.1 (tentative) cs39 [Ovis aries]                                             |
| Q <u>C</u> CESNLEPLFSGYIETLRR                              | Carbamidomethyl: 2, 3          | gi 312283584               | hair keratin type II intermediate filament [Ovis aries]                            |
|                                                            |                                |                            |                                                                                    |
| <b>Sample 1b stretch to break -2</b>                       |                                |                            |                                                                                    |
| <b>Sequence</b>                                            | <b>Modifications</b>           | <b>Accessions</b>          | <b>Proteins</b>                                                                    |
| SVC <u>G</u> GFR                                           | Carbamidomethyl: 3             | gi 312283584; gi 312283588 | hair keratin type II intermediate filament [Ovis aries]    keratin 83 [Ovis aries] |
| <u>C</u> GPC <u>N</u> SYVR                                 | Carbamidomethyl: 1, 4          | gi 999000013               | IFP Type I K31 var1 (tentative) cs39 [Ovis aries]                                  |
| TGPATTI <u>C</u> SSDK                                      | Carbamidomethyl: 8             | gi 229307                  | keratin SCMKIIB2                                                                   |
| VGG <u>S</u> ILG <u>C</u> CK                               | Carbamidomethyl: 8             | gi 312283584               | hair keratin type II intermediate filament [Ovis aries]                            |
| SRFGPC <u>N</u> TS <u>G</u> C                              | Carbamidomethyl: 6, 11         | gi 312283590               | keratin 33B [Ovis aries]                                                           |
| LG <u>C</u> SGFR                                           | Carbamidomethyl: 3             | gi 999000015               | KAP 19.5 (tentative) cs39 [Ovis aries]                                             |
| TFSS <u>C</u> SAVAPK                                       | Carbamidomethyl: 5             | gi 125117                  | RecName: Full=Keratin, type II microfibrillar, component 5                         |
| SVSALG <u>S</u> CGPR                                       | Carbamidomethyl: 8             | gi 125117                  | RecName: Full=Keratin, type II microfibrillar, component 5                         |
| SL <u>C</u> GGSGYGYGSR                                     | Carbamidomethyl: 3             | gi 999000021               | KAP 6.1 (tentative) cs39 [Ovis aries]                                              |
| <u>C</u> CISAAPYR                                          | Carbamidomethyl: 1, 2          | gi 125117                  | RecName: Full=Keratin, type II microfibrillar, component 5                         |
| AF <u>S</u> CVSA <u>C</u> GPRPGR                           | Carbamidomethyl: 4, 8          | gi 312283584; gi 312283588 | hair keratin type II intermediate filament [Ovis aries]    keratin 83 [Ovis aries] |
| VGG <u>S</u> ILG <u>C</u> CK                               | Carbamidomethyl: 8             | gi 312283584               | hair keratin type II intermediate filament [Ovis aries]                            |
| <u>C</u> CITAAPYR                                          | Carbamidomethyl: 1, 2          | gi 312283584; gi 312283588 | hair keratin type II intermediate filament [Ovis aries]    keratin 83 [Ovis aries] |
| TQTVVSP <u>C</u> QTS <u>C</u> YRPR                         | Carbamidomethyl: 9, 13         | gi 426217167               | PREDICTED: keratin-associated protein 13-1-like [Ovis aries]                       |
| TGPATTI <u>C</u> SSDK <u>F</u> CR                          | Carbamidomethyl: 8, 14         | gi 229307                  | keratin SCMKIIB2                                                                   |

|                                                                                |                                |                            |                                                                                    |
|--------------------------------------------------------------------------------|--------------------------------|----------------------------|------------------------------------------------------------------------------------|
| LGC <sup>u</sup> GYG <sup>u</sup> CGYGYGSR                                     | Carbamidomethyl: 3, 7          | gi 999000021               | KAP 6.1 (tentative) cs39 [Ovis aries]                                              |
| T <sup>u</sup> CGFSTVGS <sup>u</sup> SGFGSR                                    | Carbamidomethyl: 2             | gi 312283588               | keratin 83 [Ovis aries]                                                            |
| AVPAF <sup>u</sup> SC <sup>u</sup> VAC <sup>u</sup> GPRPGR                     | Carbamidomethyl: 7, 11         | gi 312283584               | hair keratin type II intermediate filament [Ovis aries]                            |
| TITPC <sup>u</sup> ISSPC <sup>u</sup> APAAP <sup>u</sup> CTPC <sup>u</sup> VPR | Carbamidomethyl: 5, 10, 16, 19 | gi 999000013               | IFP Type I K31 var1 (tentative) cs39 [Ovis aries]                                  |
| SGQSL <sup>u</sup> SFQPT <sup>u</sup> CGSGFY                                   | Carbamidomethyl: 11            | gi 426217167               | PREDICTED: keratin-associated protein 13-1-like [Ovis aries]                       |
|                                                                                |                                |                            |                                                                                    |
| <b>Sample 1b stretch to break -3</b>                                           |                                |                            |                                                                                    |
| <b>Sequence</b>                                                                | <b>Modifications</b>           | <b>Accessions</b>          | <b>Proteins</b>                                                                    |
| EAE <sup>u</sup> CAEAD <sup>u</sup> SGR                                        | Carbamidomethyl: 4             | gi 312283584               | hair keratin type II intermediate filament [Ovis aries]                            |
| SS <sup>u</sup> CS <sup>u</sup> SSL <sup>u</sup> SSGSR                         | Carbamidomethyl: 4             | gi 999000017               | KAP 13.1 var1 (tentative) cs39 [Ovis aries]                                        |
| ASS <sup>u</sup> F <sup>u</sup> CS <sup>u</sup> GSSR                           | Carbamidomethyl: 6             | gi 125117                  | RecName: Full=Keratin, type II microfibrillar, component 5                         |
| G <sup>u</sup> CG <sup>u</sup> GSFR                                            | Carbamidomethyl: 2, 4          | gi 999000015               | KAP 19.5 (tentative) cs39 [Ovis aries]                                             |
| TYQ <sup>u</sup> Q <sup>u</sup> SC <sup>u</sup> VSS <sup>u</sup> CR            | Carbamidomethyl: 6, 10         | gi 999000018               | KAP 11.1 (tentative) cs39 [Ovis aries]                                             |
| SV <sup>u</sup> CGGFR                                                          | Carbamidomethyl: 3             | gi 312283584; gi 312283588 | hair keratin type II intermediate filament [Ovis aries]    keratin 83 [Ovis aries] |
| C <sup>u</sup> GPC <sup>u</sup> NSYVR                                          | Carbamidomethyl: 1, 4          | gi 164652864               | keratin 31 [Ovis aries]                                                            |
| LG <sup>u</sup> CG <sup>u</sup> SGFR                                           | Carbamidomethyl: 3             | gi 999000015               | KAP 19.5 (tentative) cs39 [Ovis aries]                                             |
| VGG <sup>u</sup> SILG <sup>u</sup> C <sup>u</sup> KK                           | Carbamidomethyl: 8             | gi 312283584               | hair keratin type II intermediate filament [Ovis aries]                            |
| TF <sup>u</sup> SS <sup>u</sup> CAVAPK                                         | Carbamidomethyl: 5             | gi 125117                  | RecName: Full=Keratin, type II microfibrillar, component 5                         |
| SVSALG <sup>u</sup> SC <sup>u</sup> GPR                                        | Carbamidomethyl: 8             | gi 125117                  | RecName: Full=Keratin, type II microfibrillar, component 5                         |
| SL <sup>u</sup> CGSGYGYGSR                                                     | Carbamidomethyl: 3             | gi 999000021               | KAP 6.1 (tentative) cs39 [Ovis aries]                                              |
| C <sup>u</sup> C <sup>u</sup> SAAPYR                                           | Carbamidomethyl: 1, 2          | gi 125117                  | RecName: Full=Keratin, type II microfibrillar, component 5                         |
| C <sup>u</sup> GPC <sup>u</sup> N <sup>u</sup> TFVH                            | Carbamidomethyl: 1, 4          | gi 999000014               | IFP Type I K33a var1 (tentative) cs39 [Ovis aries]                                 |
| VGG <sup>u</sup> SILG <sup>u</sup> C <sup>u</sup> K                            | Carbamidomethyl: 8             | gi 312283584               | hair keratin type II intermediate filament [Ovis aries]                            |
| GGVAC <sup>u</sup> GGLTYSS <sup>u</sup> TAGR                                   | Carbamidomethyl: 5             | gi 125117                  | RecName: Full=Keratin, type II microfibrillar, component 5                         |

|                                                             |                                |                            |                                                                                                                       |
|-------------------------------------------------------------|--------------------------------|----------------------------|-----------------------------------------------------------------------------------------------------------------------|
| DVD <u>C</u> AYLR                                           | Carbamidomethyl: 4             | gi 312283584; gi 125117    | hair keratin type II intermediate filament [Ovis aries]    RecName: Full=Keratin, type II microfibrillar, component 5 |
| LGC <u>G</u> YG <u>C</u> GYGYGSR                            | Carbamidomethyl: 3, 7          | gi 999000021               | KAP 6.1 (tentative) cs39 [Ovis aries]                                                                                 |
| <u>C</u> CJTAAPYR                                           | Carbamidomethyl: 1, 2          | gi 312283584; gi 312283588 | hair keratin type II intermediate filament [Ovis aries]    keratin 83 [Ovis aries]                                    |
| T <u>C</u> GFSTVGSFGSR                                      | Carbamidomethyl: 2             | gi 312283588               | keratin 83 [Ovis aries]                                                                                               |
| AVPAF <u>S</u> C <u>V</u> SAC <u>G</u> PRPGR                | Carbamidomethyl: 7, 11         | gi 312283584               | hair keratin type II intermediate filament [Ovis aries]                                                               |
| SISTV <u>C</u> QPVG <u>V</u> STI <u>C</u> QPT <u>C</u> GVSR | Carbamidomethyl: 6, 16, 20     | gi 999000018               | KAP 11.1 (tentative) cs39 [Ovis aries]                                                                                |
| YSGSS <u>C</u> GSSFPNSLVYR                                  | Carbamidomethyl: 6             | gi 999000030               | KAP 13.1 (tentative) cs39 [Ovis aries]                                                                                |
| TITP <u>C</u> ISSP <u>C</u> APAAP <u>C</u> TP <u>C</u> VPR  | Carbamidomethyl: 5, 10, 16, 19 | gi 164652864               | keratin 31 [Ovis aries]                                                                                               |
| QIASGPVATGGSSITVLAPD <u>S</u> QPR                           | Carbamidomethyl: 21            | gi 125117                  | RecName: Full=Keratin, type II microfibrillar, component 5                                                            |
| SGQSLSFQPT <u>C</u> SGSFY                                   | Carbamidomethyl: 11            | gi 999000030               | KAP 13.1 (tentative) cs39 [Ovis aries]                                                                                |
|                                                             |                                |                            |                                                                                                                       |
| <b>Sample 1b stretch to break -4</b>                        |                                |                            |                                                                                                                       |
| <b>Sequence</b>                                             | <b>Modifications</b>           | <b>Accessions</b>          | <b>Proteins</b>                                                                                                       |
| ASSF <u>S</u> CGSSR                                         | Carbamidomethyl: 6             | gi 125117                  | RecName: Full=Keratin, type II microfibrillar, component 5                                                            |
| G <u>C</u> G <u>C</u> GSFR                                  | Carbamidomethyl: 2, 4          | gi 999000015; gi 999000016 | KAP 19.5 (tentative) cs39 [Ovis aries]    KAP 19.3 (tentative) cs39 [Ovis aries]                                      |
| <u>C</u> PSSFGR                                             | Carbamidomethyl: 1             | gi 999000016               | KAP 19.3 (tentative) cs39 [Ovis aries]                                                                                |
| SR <u>C</u> GP <u>C</u> NSYVR                               | Carbamidomethyl: 3, 6          | gi 999000013               | IFP Type I K31 var1 (tentative) cs39 [Ovis aries]                                                                     |
| TFRTSP <u>C</u> C                                           | Carbamidomethyl: 7, 8          | gi 125644                  | RecName: Full=Keratin, high-sulfur matrix protein, IIIA3 [Ovis aries]                                                 |
| <u>C</u> GP <u>C</u> NSYVR                                  | Carbamidomethyl: 1, 4          | gi 999000013               | IFP Type I K31 var1 (tentative) cs39 [Ovis aries]                                                                     |
| VGGSILG <u>C</u> KK                                         | Carbamidomethyl: 8             | gi 312283584               | hair keratin type II intermediate filament [Ovis aries]                                                               |
| L <u>G</u> CGSGFR                                           | Carbamidomethyl: 3             | gi 999000015               | KAP 19.5 (tentative) cs39 [Ovis aries]                                                                                |
| TGPATTI <u>C</u> SSDK                                       | Carbamidomethyl: 8             | gi 229307                  | keratin SCMKIIB2                                                                                                      |
| SRFGP <u>C</u> NTSG <u>C</u>                                | Carbamidomethyl: 6, 11         | gi 312283590               | keratin 33B [Ovis aries]                                                                                              |
| TFSS <u>C</u> SAVAPK                                        | Carbamidomethyl: 5             | gi 125117                  | RecName: Full=Keratin, type II microfibrillar, component 5                                                            |
| SVSALG <u>S</u> CGPR                                        | Carbamidomethyl: 8             | gi 125117                  | RecName: Full=Keratin, type II microfibrillar, component 5                                                            |

|                                      |                                |                                       |                                                                                                                                                                           |
|--------------------------------------|--------------------------------|---------------------------------------|---------------------------------------------------------------------------------------------------------------------------------------------------------------------------|
| SLCGSGYGYGSR                         | Carbamidomethyl: 3             | gi 999000021                          | KAP 6.1 (tentative) cs39 [Ovis aries]                                                                                                                                     |
| CCISAAPYR                            | Carbamidomethyl: 1, 2          | gi 125117                             | RecName: Full=Keratin, type II microfibrillar, component 5                                                                                                                |
| VGGSilGCK                            | Carbamidomethyl: 8             | gi 312283584                          | hair keratin type II intermediate filament [Ovis aries]                                                                                                                   |
| CGPCNTFVH                            | Carbamidomethyl: 1, 4          | gi 125091                             | RecName: Full=Keratin, type I microfibrillar, 47.6 kDa; AltName: Full=Low-sulfur keratin                                                                                  |
| AFSCVSA_CGPRPGR                      | Carbamidomethyl: 4, 8          | gi 312283584; gi 312283588            | hair keratin type II intermediate filament [Ovis aries]    keratin 83 [Ovis aries]                                                                                        |
| CCITAAPYR                            | Carbamidomethyl: 1, 2          | gi 312283584; gi 312283588            | hair keratin type II intermediate filament [Ovis aries]    keratin 83 [Ovis aries]                                                                                        |
| TQTVVSSP_CQTSCYRPR                   | Carbamidomethyl: 9, 13         | gi 999000030                          | KAP 13.1 (tentative) cs39 [Ovis aries]                                                                                                                                    |
| TGPATTI_CSSDKFCR                     | Carbamidomethyl: 8, 14         | gi 229307                             | keratin SCMKIIB2                                                                                                                                                          |
| GGVACGGGLTYSSTAGR                    | Carbamidomethyl: 5             | gi 125117                             | RecName: Full=Keratin, type II microfibrillar, component 5                                                                                                                |
| LG_CGYG_CGYGYGSR                     | Carbamidomethyl: 3, 7          | gi 999000021                          | KAP 6.1 (tentative) cs39 [Ovis aries]                                                                                                                                     |
| AVPAFSCVSA_CGPRPGR                   | Carbamidomethyl: 7, 11         | gi 312283584                          | hair keratin type II intermediate filament [Ovis aries]                                                                                                                   |
| T_CGFSTVSGFGSR                       | Carbamidomethyl: 2             | gi 312283588                          | keratin 83 [Ovis aries]                                                                                                                                                   |
| ILDELT_LCK                           | Carbamidomethyl: 8             | gi 312283590; gi 999000013; gi 125091 | keratin 33B [Ovis aries]    IFP Type I K31 var1 (tentative) cs39 [Ovis aries]    RecName: Full=Keratin, type I microfibrillar, 47.6 kDa; AltName: Full=Low-sulfur keratin |
| TGSCCGPTFSSLS_CGGGCLQPR              | Carbamidomethyl: 4, 5, 14, 18  | gi 125644                             | RecName: Full=Keratin, high-sulfur matrix protein, IIIA3 [Ovis aries]                                                                                                     |
| YSGSS_CGSSFPSNLVYR                   | Carbamidomethyl: 6             | gi 999000030                          | KAP 13.1 (tentative) cs39 [Ovis aries]                                                                                                                                    |
| TITPCISSPCAPAAP_CTP_CVPR             | Carbamidomethyl: 5, 10, 16, 19 | gi 999000013                          | IFP Type I K31 var1 (tentative) cs39 [Ovis aries]                                                                                                                         |
| SGQSLSFQPT_CGSGFY                    | Carbamidomethyl: 11            | gi 999000030                          | KAP 13.1 (tentative) cs39 [Ovis aries]                                                                                                                                    |
| DLNMD_CVVAEIK                        | Propionamide: 6                | gi 125117                             | RecName: Full=Keratin, type II microfibrillar, component 5                                                                                                                |
| DLNMD_CIVAIEIK                       | Carbamidomethyl: 6             | gi 312283588                          | keratin 83 [Ovis aries]                                                                                                                                                   |
|                                      |                                |                                       |                                                                                                                                                                           |
| <b>Sample 1b stretch to break -5</b> |                                |                                       |                                                                                                                                                                           |
| <b>Sequence</b>                      | <b>Modifications</b>           | <b>Accessions</b>                     | <b>Proteins</b>                                                                                                                                                           |
| SSSC_SSSLSSGSR                       | Carbamidomethyl: 4             | gi 426219157                          | PREDICTED: keratin-associated protein 13-1-like [Ovis aries]                                                                                                              |
| ASSFSC_GSSR                          | Carbamidomethyl: 6             | gi 246276                             | type II intermediate-filament protein component 5 [sheep, wool, Peptide, 503 aa]                                                                                          |



|                          |                                |                            |                                                                                                                                             |
|--------------------------|--------------------------------|----------------------------|---------------------------------------------------------------------------------------------------------------------------------------------|
| GISCYR                   | Carbamidomethyl: 4             | gi 312283584; gi 312283588 | hair keratin type II intermediate filament [Ovis aries]    keratin 83 [Ovis aries]                                                          |
| TGPATTI_CSSDK            | Carbamidomethyl: 8             | gi 229307                  | keratin SCMKIIIB2                                                                                                                           |
| CGPCNSYVR                | Carbamidomethyl: 1, 4          | gi 125090                  | RecName: Full=Keratin, type I microfibrillar 48 kDa, component 8C-1; AltName: Full=Low-sulfur keratin                                       |
| VGGSILGCKK               | Carbamidomethyl: 8             | gi 312283584               | hair keratin type II intermediate filament [Ovis aries]                                                                                     |
| LGCGSGFR                 | Carbamidomethyl: 3             | gi 999000015               | KAP 19.5 (tentative) cs39 [Ovis aries]                                                                                                      |
| AFSCVSACGPRPGR           | Carbamidomethyl: 4, 8          | gi 312283584; gi 312283588 | hair keratin type II intermediate filament [Ovis aries]    keratin 83 [Ovis aries]                                                          |
| SLCGSGYGYGSR             | Carbamidomethyl: 3             | gi 999000021               | KAP 6.1 (tentative) cs39 [Ovis aries]                                                                                                       |
| CCISAAPYR                | Carbamidomethyl: 1, 2          | gi 246276                  | type II intermediate-filament protein component 5 [sheep, wool, Peptide, 503 aa]                                                            |
| CCITAAPYR                | Carbamidomethyl: 1, 2          | gi 312283584; gi 312283588 | hair keratin type II intermediate filament [Ovis aries]    keratin 83 [Ovis aries]                                                          |
| TGPATTI_CSSDKFCR         | Carbamidomethyl: 8, 14         | gi 229307                  | keratin SCMKIIIB2                                                                                                                           |
| CGPCNTFVH                | Carbamidomethyl: 1, 4          | gi 999000014               | IFP Type I K33a var1 (tentative) cs39 [Ovis aries]                                                                                          |
| LGCGYGCGYGYGSR           | Carbamidomethyl: 3, 7          | gi 999000021               | KAP 6.1 (tentative) cs39 [Ovis aries]                                                                                                       |
| VGGSILGCK                | Carbamidomethyl: 8             | gi 312283584               | hair keratin type II intermediate filament [Ovis aries]                                                                                     |
| DVD_CAYLR                | Carbamidomethyl: 4             | gi 312283584; gi 246276    | hair keratin type II intermediate filament [Ovis aries]    type II intermediate-filament protein component 5 [sheep, wool, Peptide, 503 aa] |
| T_CGFSTVSGFGSR           | Carbamidomethyl: 2             | gi 312283588               | keratin 83 [Ovis aries]                                                                                                                     |
| AVPAFSCVSACGPRPGR        | Carbamidomethyl: 7, 11         | gi 312283584               | hair keratin type II intermediate filament [Ovis aries]                                                                                     |
| YSGSS_CGSSFPSNLVYR       | Carbamidomethyl: 6             | gi 999000030               | KAP 13.1 (tentative) cs39 [Ovis aries]                                                                                                      |
| TITP_CISSPCAPAAPCTPCVPR  | Carbamidomethyl: 5, 10, 16, 19 | gi 125090                  | RecName: Full=Keratin, type I microfibrillar 48 kDa, component 8C-1; AltName: Full=Low-sulfur keratin                                       |
| QIASGPVATGGSITVLAPDSCQPR | Carbamidomethyl: 21            | gi 246276                  | type II intermediate-filament protein component 5 [sheep, wool, Peptide, 503 aa]                                                            |
| SGQSLSFQPT_CGSGFY        | Carbamidomethyl: 11            | gi 999000030               | KAP 13.1 (tentative) cs39 [Ovis aries]                                                                                                      |

## Supplementary Table 4 - Sample 2a

Supplementary Table 4

| Sample 2a 25% stretch -1 |                          |                                     |                                                                                                                                                       |
|--------------------------|--------------------------|-------------------------------------|-------------------------------------------------------------------------------------------------------------------------------------------------------|
| Sequence                 | Modifications            | Accessions                          | Proteins                                                                                                                                              |
| EAECAEADSGR              | Carbamidomethyl: 4       | gi 312283584; gi 1308               | hair keratin type II intermediate filament [Ovis aries]    hair type II keratin intermediate filament protein [Ovis aries]                            |
| ASSFSCGSSR               | Carbamidomethyl: 6       | gi 246276                           | type II intermediate-filament protein component 5 [sheep, wool, Peptide, 503 aa]                                                                      |
| PTSCQPAPCR               | Carbamidomethyl: 4, 9    | gi 999000040                        | KAP 2.3 var1 (tentative) cs39 [Ovis aries]                                                                                                            |
| CPSSFGR                  | Carbamidomethyl: 1       | gi 999000016                        | KAP 19.3 (tentative) cs39 [Ovis aries]                                                                                                                |
| TYQSCVSSCR               | Carbamidomethyl: 6, 10   | gi 999000018                        | KAP 11.1 (tentative) cs39 [Ovis aries]                                                                                                                |
| SVCGGFR                  | Carbamidomethyl: 3       | gi 312283588; gi 312283584; gi 1308 | keratin 83 [Ovis aries]    hair keratin type II intermediate filament [Ovis aries]    hair type II keratin intermediate filament protein [Ovis aries] |
| CTRPICEPCR               | Carbamidomethyl: 1, 6, 9 | gi 999000040                        | KAP 2.3 var1 (tentative) cs39 [Ovis aries]                                                                                                            |
| CGPCNSYVR                | Carbamidomethyl: 1, 4    | gi 999000013                        | IFP Type I K31 var1 (tentative) cs39 [Ovis aries]                                                                                                     |
| SVSALGSCGPR              | Carbamidomethyl: 8       | gi 246276                           | type II intermediate-filament protein component 5 [sheep, wool, Peptide, 503 aa]                                                                      |
| DVDCAAYVR                | Carbamidomethyl: 4       | gi 312283588                        | keratin 83 [Ovis aries]                                                                                                                               |
| TFSSCSAVAPK              | Carbamidomethyl: 5       | gi 246276                           | type II intermediate-filament protein component 5 [sheep, wool, Peptide, 503 aa]                                                                      |
| VGGGILGCK                | Carbamidomethyl: 8       | gi 312283584                        | hair keratin type II intermediate filament [Ovis aries]                                                                                               |
| AFSCVSAAGPR              | Carbamidomethyl: 4, 8    | gi 312283588; gi 1308               | keratin 83 [Ovis aries]    hair type II keratin intermediate filament protein [Ovis aries]                                                            |
| CCITAAPYR                | Carbamidomethyl: 1, 2    | gi 312283588; gi 312283584; gi 1308 | keratin 83 [Ovis aries]    hair keratin type II intermediate filament [Ovis aries]    hair type II keratin intermediate filament protein [Ovis aries] |
| TQTVVSSPQTSYRPR          | Carbamidomethyl: 9, 13   | gi 999000030                        | KAP 13.1 (tentative) cs39 [Ovis aries]                                                                                                                |
| LECEINTYR                | Carbamidomethyl: 3       | gi 999000013                        | IFP Type I K31 var1 (tentative) cs39 [Ovis aries]                                                                                                     |
| GGVACGGGLTYSSTAGR        | Carbamidomethyl: 5       | gi 246276                           | type II intermediate-filament protein component 5 [sheep, wool, Peptide, 503 aa]                                                                      |
| DVDCAYLRL                | Carbamidomethyl: 4       | gi 312283584; gi 1308; gi 246276    | hair keratin type II intermediate filament [Ovis aries]    hair type II keratin intermediate filament protein [Ovis aries]    type II intermediate-   |

|                                                             |                            |                                          |                                                                                                                                                     |
|-------------------------------------------------------------|----------------------------|------------------------------------------|-----------------------------------------------------------------------------------------------------------------------------------------------------|
|                                                             |                            |                                          | filament protein component 5 [sheep, wool, Peptide, 503 aa]                                                                                         |
| ARLE <u>CE</u> INTYR                                        | Carbamidomethyl: 5         | gi 999000013                             | IFP Type I K31 var1 (tentative) cs39 [Ovis aries]                                                                                                   |
| LPSNP <u>C</u> ATTNASSNF <u>CR</u>                          | Carbamidomethyl: 6, 16     | gi 426238003                             | PREDICTED: keratin 34 [Ovis aries]                                                                                                                  |
| T <u>CG</u> FSTVGS <u>G</u> FGSR                            | Carbamidomethyl: 2         | gi 312283588                             | keratin 83 [Ovis aries]                                                                                                                             |
| L <u>CE</u> GVGSVNV <u>C</u> VSSSR                          | Carbamidomethyl: 2, 11     | gi 1308; gi 246276                       | hair type II keratin intermediate filament protein [Ovis aries]    type II intermediate-filament protein component 5 [sheep, wool, Peptide, 503 aa] |
| L <u>CE</u> GVGAVNV <u>C</u> VSSSR                          | Carbamidomethyl: 2, 11     | gi 312283588; gi 312283584               | keratin 83 [Ovis aries]    hair keratin type II intermediate filament [Ovis aries]                                                                  |
| AVPAF <u>S</u> <u>C</u> VSAC <u>G</u> PR                    | Carbamidomethyl: 7, 11     | gi 312283584                             | hair keratin type II intermediate filament [Ovis aries]                                                                                             |
| SISTV <u>C</u> QPVG <u>V</u> STI <u>C</u> QPT <u>C</u> GVSR | Carbamidomethyl: 6, 16, 20 | gi 999000018                             | KAP 11.1 (tentative) cs39 [Ovis aries]                                                                                                              |
| ILDELTL <u>C</u> K                                          | Carbamidomethyl: 8         | gi 999000013; gi 312283590; gi 426238003 | IFP Type I K31 var1 (tentative) cs39 [Ovis aries]    keratin 33B [Ovis aries]    PREDICTED: keratin 34 [Ovis aries]                                 |
| YSGSS <u>C</u> GSSFPSNLVYR                                  | Carbamidomethyl: 6         | gi 999000030                             | KAP 13.1 (tentative) cs39 [Ovis aries]                                                                                                              |
| VESLKEELL <u>C</u> LK                                       | Carbamidomethyl: 10        | gi 426238003                             | PREDICTED: keratin 34 [Ovis aries]                                                                                                                  |
| VESLKEELI <u>C</u> LK                                       | Carbamidomethyl: 10        | gi 999000013; gi 312283590               | IFP Type I K31 var1 (tentative) cs39 [Ovis aries]    keratin 33B [Ovis aries]                                                                       |
| SGQSLSFQPT <u>C</u> GSGFY                                   | Carbamidomethyl: 11        | gi 999000030                             | KAP 13.1 (tentative) cs39 [Ovis aries]                                                                                                              |
| DLNMD <u>C</u> VVAEIK                                       | Propionamide: 6            | gi 246276                                | type II intermediate-filament protein component 5 [sheep, wool, Peptide, 503 aa]                                                                    |
| DLNMD <u>C</u> IVAEIK                                       | Carbamidomethyl: 6         | gi 312283588                             | keratin 83 [Ovis aries]                                                                                                                             |
| SDLEAQVESLKEELL <u>C</u> LK                                 | Carbamidomethyl: 16        | gi 426238003                             | PREDICTED: keratin 34 [Ovis aries]                                                                                                                  |
| SDLEAQVESLKEELI <u>C</u> LK                                 | Carbamidomethyl: 16        | gi 999000013; gi 312283590               | IFP Type I K31 var1 (tentative) cs39 [Ovis aries]    keratin 33B [Ovis aries]                                                                       |
| Y <u>S</u> QNLNQVQSLISNVESQLAEIR                            | Carbamidomethyl: 3         | gi 999000013                             | IFP Type I K31 var1 (tentative) cs39 [Ovis aries]                                                                                                   |
| Y <u>S</u> QLSQVQSLIVNVESQLAEIR                             | Carbamidomethyl: 3         | gi 312283590                             | keratin 33B [Ovis aries]                                                                                                                            |
|                                                             |                            |                                          |                                                                                                                                                     |
| <b>Sample 2a 25% stretch -2</b>                             |                            |                                          |                                                                                                                                                     |
| <b>Sequence</b>                                             | <b>Modifications</b>       | <b>Accessions</b>                        | <b>Proteins</b>                                                                                                                                     |
| SS <u>S</u> CSLSLSSGSR                                      | Carbamidomethyl: 4         | gi 359801728                             | keratin-associated protein KAP13-3 [Ovis aries]                                                                                                     |
| ASSF <u>S</u> CGSSR                                         | Carbamidomethyl: 6         | gi 246276                                | type II intermediate-filament protein component 5 [sheep, wool, Peptide, 503 aa]                                                                    |

|                  |                                     |                            |                                                                                                                                                             |
|------------------|-------------------------------------|----------------------------|-------------------------------------------------------------------------------------------------------------------------------------------------------------|
| GCGGGSFR         | Carbamidomethyl: 2, 4               | gi 999000015               | KAP 19.5 (tentative) cs39 [Ovis aries]                                                                                                                      |
| TYQQSCVSSCR      | Carbamidomethyl: 6, 10              | gi 999000018               | KAP 11.1 (tentative) cs39 [Ovis aries]                                                                                                                      |
| TGPATTI_CSSDK    | Carbamidomethyl: 8                  | gi 229307                  | keratin SCMKIIB2                                                                                                                                            |
| CGPCNSYVR        | Carbamidomethyl: 1, 4               | gi 125090                  | RecName: Full=Keratin, type I microfibrillar 48 kDa, component 8C-1; AltName: Full=Low-sulfur keratin                                                       |
| VGGSILGCKK       | Carbamidomethyl: 8                  | gi 312283584               | hair keratin type II intermediate filament [Ovis aries]                                                                                                     |
| LGCGSGFR         | Carbamidomethyl: 3                  | gi 999000015               | KAP 19.5 (tentative) cs39 [Ovis aries]                                                                                                                      |
| SRFGPCNTSGC      | Carbamidomethyl: 6, 11              | gi 312283590               | keratin 33B [Ovis aries]                                                                                                                                    |
| TFSSCSAVAPK      | Carbamidomethyl: 5                  | gi 246276                  | type II intermediate-filament protein component 5 [sheep, wool, Peptide, 503 aa]                                                                            |
| SVSALGSCGPR      | Carbamidomethyl: 8                  | gi 246276                  | type II intermediate-filament protein component 5 [sheep, wool, Peptide, 503 aa]                                                                            |
| SLCGSGYGYGSR     | Carbamidomethyl: 3                  | gi 999000021               | KAP 6.1 (tentative) cs39 [Ovis aries]                                                                                                                       |
| AFSCVSA_CGPRPGR  | Carbamidomethyl: 4, 8               | gi 312283584; gi 312283588 | hair keratin type II intermediate filament [Ovis aries]    keratin 83 [Ovis aries]                                                                          |
| CCISAAPYR        | Carbamidomethyl: 1, 2               | gi 246276                  | type II intermediate-filament protein component 5 [sheep, wool, Peptide, 503 aa]                                                                            |
| CGPCNTFVH        | Carbamidomethyl: 1, 4               | gi 999000014               | IFP Type I K33a var1 (tentative) cs39 [Ovis aries]                                                                                                          |
| CCITAAPYR        | Carbamidomethyl: 1, 2               | gi 312283584; gi 312283588 | hair keratin type II intermediate filament [Ovis aries]    keratin 83 [Ovis aries]                                                                          |
| VGGSILGCK        | Carbamidomethyl: 8                  | gi 312283584               | hair keratin type II intermediate filament [Ovis aries]                                                                                                     |
| VGGSILGCK        | Propionamide: 8                     | gi 312283584               | hair keratin type II intermediate filament [Ovis aries]                                                                                                     |
| CCITAAPYR        | Carbamidomethyl: 1; Propionamide: 2 | gi 312283584; gi 312283588 | hair keratin type II intermediate filament [Ovis aries]    keratin 83 [Ovis aries]                                                                          |
| LECEINTYR        | Carbamidomethyl: 3                  | gi 125090; gi 999000014    | RecName: Full=Keratin, type I microfibrillar 48 kDa, component 8C-1; AltName: Full=Low-sulfur keratin    IFP Type I K33a var1 (tentative) cs39 [Ovis aries] |
| DVD_CAYLR        | Carbamidomethyl: 4                  | gi 246276; gi 312283584    | type II intermediate-filament protein component 5 [sheep, wool, Peptide, 503 aa]    hair keratin type II intermediate filament [Ovis aries]                 |
| TGPATTI_CSSDKFCR | Carbamidomethyl: 8, 14              | gi 229307                  | keratin SCMKIIB2                                                                                                                                            |
| GGVACGGLTYSSTAGR | Carbamidomethyl: 5                  | gi 246276                  | type II intermediate-filament protein component 5 [sheep, wool, Peptide, 503 aa]                                                                            |
| LGCGYG_CGYGYGSR  | Carbamidomethyl: 3, 7               | gi 999000021               | KAP 6.1 (tentative) cs39 [Ovis aries]                                                                                                                       |

|                                                            |                                |                                                     |                                                                                                                                                                                                                               |
|------------------------------------------------------------|--------------------------------|-----------------------------------------------------|-------------------------------------------------------------------------------------------------------------------------------------------------------------------------------------------------------------------------------|
| TGPATTI <u>C</u> SSDKF                                     | Carbamidomethyl: 8             | gi 229307                                           | keratin SCMKIIB2                                                                                                                                                                                                              |
| T <u>C</u> GFSTVGS <u>G</u> FGSR                           | Carbamidomethyl: 2             | gi 312283588                                        | keratin 83 [Ovis aries]                                                                                                                                                                                                       |
| SISTV <u>C</u> QPVGGVSTI <u>C</u> QPT <u>C</u> GVSR        | Carbamidomethyl: 6, 16, 20     | gi 999000018                                        | KAP 11.1 (tentative) cs39 [Ovis aries]                                                                                                                                                                                        |
| ILDELTL <u>C</u> K                                         | Carbamidomethyl: 8             | gi 312283590; gi 125090; gi 426238003; gi 999000014 | keratin 33B [Ovis aries]    RecName: Full=Keratin, type I microfibrillar 48 kDa, component 8C-1; AltName: Full=Low-sulfur keratin    PREDICTED: keratin 34 [Ovis aries]    IFP Type I K33a var1 (tentative) cs39 [Ovis aries] |
| YSGSS <u>C</u> GSSFPSNLVYR                                 | Carbamidomethyl: 6             | gi 999000030                                        | KAP 13.1 (tentative) cs39 [Ovis aries]                                                                                                                                                                                        |
| TITP <u>C</u> ISSP <u>C</u> APAAP <u>C</u> TP <u>C</u> VPR | Carbamidomethyl: 5, 10, 16, 19 | gi 125090                                           | RecName: Full=Keratin, type I microfibrillar 48 kDa, component 8C-1; AltName: Full=Low-sulfur keratin                                                                                                                         |
| QIASGPVATGGSITVLAPD <u>S</u> CQPR                          | Carbamidomethyl: 21            | gi 246276                                           | type II intermediate-filament protein component 5 [sheep, wool, Peptide, 503 aa]                                                                                                                                              |
| SGQSLSFQPT <u>C</u> GSFY                                   | Carbamidomethyl: 11            | gi 999000030                                        | KAP 13.1 (tentative) cs39 [Ovis aries]                                                                                                                                                                                        |
| <u>C</u> CESNLEPLFNGYIETLRR                                | Carbamidomethyl: 1, 2          | gi 246276                                           | type II intermediate-filament protein component 5 [sheep, wool, Peptide, 503 aa]                                                                                                                                              |
| Q <u>C</u> CESNLEPLFSGYIETLRR                              | Carbamidomethyl: 2, 3          | gi 312283584                                        | hair keratin type II intermediate filament [Ovis aries]                                                                                                                                                                       |
|                                                            |                                |                                                     |                                                                                                                                                                                                                               |
| <b>Sample 2a 25% stretch -3</b>                            |                                |                                                     |                                                                                                                                                                                                                               |
| <b>Sequence</b>                                            | <b>Modifications</b>           | <b>Accessions</b>                                   | <b>Proteins</b>                                                                                                                                                                                                               |
| SSS <u>C</u> SSLSSGSR                                      | Carbamidomethyl: 4             | gi 999000017                                        | KAP 13.1 var1 (tentative) cs39 [Ovis aries]                                                                                                                                                                                   |
| ASSF <u>S</u> C <u>G</u> SSR                               | Carbamidomethyl: 6             | gi 246276                                           | type II intermediate-filament protein component 5 [sheep, wool, Peptide, 503 aa]                                                                                                                                              |
| GIS <u>C</u> YR                                            | Carbamidomethyl: 4             | gi 312283584; gi 312283588                          | hair keratin type II intermediate filament [Ovis aries]    keratin 83 [Ovis aries]                                                                                                                                            |
| TYQQS <u>C</u> VSS <u>C</u> R                              | Carbamidomethyl: 6, 10         | gi 999000018                                        | KAP 11.1 (tentative) cs39 [Ovis aries]                                                                                                                                                                                        |
| SVC <u>G</u> GFR                                           | Carbamidomethyl: 3             | gi 312283584; gi 312283588                          | hair keratin type II intermediate filament [Ovis aries]    keratin 83 [Ovis aries]                                                                                                                                            |
| <u>C</u> G <u>P</u> CNSYVR                                 | Carbamidomethyl: 1, 4          | gi 999000013                                        | IFP Type I K31 var1 (tentative) cs39 [Ovis aries]                                                                                                                                                                             |
| TGPATTI <u>C</u> SSDK                                      | Carbamidomethyl: 8             | gi 229307                                           | keratin SCMKIIB2                                                                                                                                                                                                              |
| VGG <u>S</u> ILG <u>C</u> KK                               | Carbamidomethyl: 8             | gi 312283584                                        | hair keratin type II intermediate filament [Ovis aries]                                                                                                                                                                       |
| LG <u>C</u> GS <u>G</u> FR                                 | Carbamidomethyl: 3             | gi 999000015                                        | KAP 19.5 (tentative) cs39 [Ovis aries]                                                                                                                                                                                        |
| SRFGP <u>C</u> NTSG <u>C</u>                               | Carbamidomethyl: 6, 11         | gi 312283590                                        | keratin 33B [Ovis aries]                                                                                                                                                                                                      |

|                                 |                            |                            |                                                                                                                            |
|---------------------------------|----------------------------|----------------------------|----------------------------------------------------------------------------------------------------------------------------|
| SVSALGSCGPR                     | Carbamidomethyl: 8         | gi 246276                  | type II intermediate-filament protein component 5 [sheep, wool, Peptide, 503 aa]                                           |
| TRCGPCNTFVH                     | Carbamidomethyl: 3, 6      | gi 999000014               | IFP Type I K33a var1 (tentative) cs39 [Ovis aries]                                                                         |
| TFSSCSAVAPK                     | Carbamidomethyl: 5         | gi 246276                  | type II intermediate-filament protein component 5 [sheep, wool, Peptide, 503 aa]                                           |
| SLCGSGYGYGSR                    | Carbamidomethyl: 3         | gi 999000021               | KAP 6.1 (tentative) cs39 [Ovis aries]                                                                                      |
| AFSCVSACGPRPGR                  | Carbamidomethyl: 4, 8      | gi 312283584; gi 312283588 | hair keratin type II intermediate filament [Ovis aries]    keratin 83 [Ovis aries]                                         |
| CCISAAPYR                       | Carbamidomethyl: 1, 2      | gi 246276                  | type II intermediate-filament protein component 5 [sheep, wool, Peptide, 503 aa]                                           |
| CGPCNTFVH                       | Carbamidomethyl: 1, 4      | gi 999000014               | IFP Type I K33a var1 (tentative) cs39 [Ovis aries]                                                                         |
| VGGILGCK                        | Carbamidomethyl: 8         | gi 312283584               | hair keratin type II intermediate filament [Ovis aries]                                                                    |
| CCITAAPYR                       | Carbamidomethyl: 1, 2      | gi 312283584; gi 312283588 | hair keratin type II intermediate filament [Ovis aries]    keratin 83 [Ovis aries]                                         |
| TGPATICSSDKFCR                  | Carbamidomethyl: 8, 14     | gi 229307                  | keratin SCMKIIB2                                                                                                           |
| LGGYGCYGYGSR                    | Carbamidomethyl: 3, 7      | gi 999000021               | KAP 6.1 (tentative) cs39 [Ovis aries]                                                                                      |
| VGGILGCK                        | Propionamide: 8            | gi 312283584               | hair keratin type II intermediate filament [Ovis aries]                                                                    |
| TGCFSTVSGFGSR                   | Carbamidomethyl: 2         | gi 312283588               | keratin 83 [Ovis aries]                                                                                                    |
| AVPAFSCVSACGPRPGR               | Carbamidomethyl: 7, 11     | gi 312283584               | hair keratin type II intermediate filament [Ovis aries]                                                                    |
| CCITAAPYRGISCYR                 | Carbamidomethyl: 1, 2, 13  | gi 312283584; gi 312283588 | hair keratin type II intermediate filament [Ovis aries]    keratin 83 [Ovis aries]                                         |
| RCGFSSFY                        | Carbamidomethyl: 2         | gi 999000015               | KAP 19.5 (tentative) cs39 [Ovis aries]                                                                                     |
| SISTVCQPVGGVSTICQPTCGVSR        | Carbamidomethyl: 6, 16, 20 | gi 999000018               | KAP 11.1 (tentative) cs39 [Ovis aries]                                                                                     |
| SGQSLFQPTCGSGFY                 | Carbamidomethyl: 11        | gi 426217167               | PREDICTED: keratin-associated protein 13-1-like [Ovis aries]                                                               |
|                                 |                            |                            |                                                                                                                            |
| <b>Sample 2a 25% stretch -4</b> |                            |                            |                                                                                                                            |
| <b>Sequence</b>                 | <b>Modifications</b>       | <b>Accessions</b>          | <b>Proteins</b>                                                                                                            |
| EAECAEADSGR                     | Carbamidomethyl: 4         | gi 312283584; gi 1308      | hair keratin type II intermediate filament [Ovis aries]    hair type II keratin intermediate filament protein [Ovis aries] |
| ASSFCGSSR                       | Carbamidomethyl: 6         | gi 246276                  | type II intermediate-filament protein component 5 [sheep, wool, Peptide, 503 aa]                                           |

|                  |                        |                                     |                                                                                                                                                                                                                |
|------------------|------------------------|-------------------------------------|----------------------------------------------------------------------------------------------------------------------------------------------------------------------------------------------------------------|
| TYQQSCVSSCR      | Carbamidomethyl: 6, 10 | gi 999000018                        | KAP 11.1 (tentative) cs39 [Ovis aries]                                                                                                                                                                         |
| CGPCNSYVR        | Carbamidomethyl: 1, 4  | gi 125090                           | RecName: Full=Keratin, type I microfibillar 48 kDa, component 8C-1; AltName: Full=Low-sulfur keratin                                                                                                           |
| SVSALGSCGPR      | Carbamidomethyl: 8     | gi 246276                           | type II intermediate-filament protein component 5 [sheep, wool, Peptide, 503 aa]                                                                                                                               |
| DVDCAYVR         | Carbamidomethyl: 4     | gi 312283588                        | keratin 83 [Ovis aries]                                                                                                                                                                                        |
| TFSSCSAVAPK      | Carbamidomethyl: 5     | gi 246276                           | type II intermediate-filament protein component 5 [sheep, wool, Peptide, 503 aa]                                                                                                                               |
| SLCGSGYGYGSR     | Carbamidomethyl: 3     | gi 999000021                        | KAP 6.1 (tentative) cs39 [Ovis aries]                                                                                                                                                                          |
| CCISAAPYR        | Carbamidomethyl: 1, 2  | gi 246276                           | type II intermediate-filament protein component 5 [sheep, wool, Peptide, 503 aa]                                                                                                                               |
| AFSCVSACGPRPGR   | Carbamidomethyl: 4, 8  | gi 312283584; gi 1308; gi 312283588 | hair keratin type II intermediate filament [Ovis aries]    hair type II keratin intermediate filament protein [Ovis aries]    keratin 83 [Ovis aries]                                                          |
| VGGSILGCK        | Carbamidomethyl: 8     | gi 312283584                        | hair keratin type II intermediate filament [Ovis aries]                                                                                                                                                        |
| AFSCVSACGPR      | Carbamidomethyl: 4, 8  | gi 1308; gi 312283588               | hair type II keratin intermediate filament protein [Ovis aries]    keratin 83 [Ovis aries]                                                                                                                     |
| CCITAAPYR        | Carbamidomethyl: 1, 2  | gi 312283584; gi 1308; gi 312283588 | hair keratin type II intermediate filament [Ovis aries]    hair type II keratin intermediate filament protein [Ovis aries]    keratin 83 [Ovis aries]                                                          |
| LECEINTYR        | Carbamidomethyl: 3     | gi 125090                           | RecName: Full=Keratin, type I microfibillar 48 kDa, component 8C-1; AltName: Full=Low-sulfur keratin                                                                                                           |
| DVDCAYLR         | Carbamidomethyl: 4     | gi 312283584; gi 1308; gi 246276    | hair keratin type II intermediate filament [Ovis aries]    hair type II keratin intermediate filament protein [Ovis aries]    type II intermediate-filament protein component 5 [sheep, wool, Peptide, 503 aa] |
| LGCGYGCGYGYGSR   | Carbamidomethyl: 3, 7  | gi 999000021                        | KAP 6.1 (tentative) cs39 [Ovis aries]                                                                                                                                                                          |
| ARLECEINTYR      | Carbamidomethyl: 5     | gi 125090                           | RecName: Full=Keratin, type I microfibillar 48 kDa, component 8C-1; AltName: Full=Low-sulfur keratin                                                                                                           |
| LCEGVGSVNVCVSSSR | Carbamidomethyl: 2, 11 | gi 1308; gi 246276                  | hair type II keratin intermediate filament protein [Ovis aries]    type II intermediate-filament protein component 5 [sheep, wool, Peptide, 503 aa]                                                            |
| TCGFSTVGSFGSR    | Carbamidomethyl: 2     | gi 312283588                        | keratin 83 [Ovis aries]                                                                                                                                                                                        |
| LCEGVGAVNVCVSSSR | Carbamidomethyl: 2, 11 | gi 312283584; gi 312283588          | hair keratin type II intermediate filament [Ovis aries]    keratin 83 [Ovis aries]                                                                                                                             |

|                                           |                           |                                                |                                                                                                                                                                                                                                           |
|-------------------------------------------|---------------------------|------------------------------------------------|-------------------------------------------------------------------------------------------------------------------------------------------------------------------------------------------------------------------------------------------|
| QDMA <u>C</u> LLK                         | Carbamidomethyl: 5        | gi 312283584; gi 1308; gi 312283588; gi 246276 | hair keratin type II intermediate filament [Ovis aries]    hair type II keratin intermediate filament protein [Ovis aries]    keratin 83 [Ovis aries]    type II intermediate-filament protein component 5 [sheep, wool, Peptide, 503 aa] |
| ILDELT <u>L</u> CK                        | Carbamidomethyl: 8        | gi 125090; gi 312283590; gi 426238003          | RecName: Full=Keratin, type I microfibrillar 48 kDa, component 8C-1; AltName: Full=Low-sulfur keratin    keratin 33B [Ovis aries]    PREDICTED: keratin 34 [Ovis aries]                                                                   |
| YSGSS <u>C</u> GSSFPSNLVYR                | Carbamidomethyl: 6        | gi 999000030                                   | KAP 13.1 (tentative) cs39 [Ovis aries]                                                                                                                                                                                                    |
| VESLKEEL <u>I</u> CLK                     | Carbamidomethyl: 10       | gi 125090; gi 312283590                        | RecName: Full=Keratin, type I microfibrillar 48 kDa, component 8C-1; AltName: Full=Low-sulfur keratin    keratin 33B [Ovis aries]                                                                                                         |
| VESLKEEL <u>L</u> CLK                     | Carbamidomethyl: 10       | gi 426238003                                   | PREDICTED: keratin 34 [Ovis aries]                                                                                                                                                                                                        |
| DLNMD <u>C</u> VVAEIK                     | Carbamidomethyl: 6        | gi 246276                                      | type II intermediate-filament protein component 5 [sheep, wool, Peptide, 503 aa]                                                                                                                                                          |
| Q <u>C</u> CESNLEPLFSGYIETLR              | Carbamidomethyl: 2, 3     | gi 312283584; gi 1308                          | hair keratin type II intermediate filament [Ovis aries]    hair type II keratin intermediate filament protein [Ovis aries]                                                                                                                |
| SDLEAQVESLKEEL <u>I</u> CLK               | Carbamidomethyl: 16       | gi 125090; gi 312283590                        | RecName: Full=Keratin, type I microfibrillar 48 kDa, component 8C-1; AltName: Full=Low-sulfur keratin    keratin 33B [Ovis aries]                                                                                                         |
| SDLEAQVESLKEEL <u>L</u> CLK               | Carbamidomethyl: 16       | gi 426238003                                   | PREDICTED: keratin 34 [Ovis aries]                                                                                                                                                                                                        |
| Y <u>S</u> QLNQVQSLISNVESQLAEIR           | Carbamidomethyl: 3        | gi 125090                                      | RecName: Full=Keratin, type I microfibrillar 48 kDa, component 8C-1; AltName: Full=Low-sulfur keratin                                                                                                                                     |
| Y <u>S</u> QLSQVQSLIVNVESQLAEIR           | Carbamidomethyl: 3        | gi 312283590                                   | keratin 33B [Ovis aries]                                                                                                                                                                                                                  |
|                                           |                           |                                                |                                                                                                                                                                                                                                           |
| <b>Sample 2a 25% stretch -5</b>           |                           |                                                |                                                                                                                                                                                                                                           |
| <b>Sequence</b>                           | <b>Modifications</b>      | <b>Accessions</b>                              | <b>Proteins</b>                                                                                                                                                                                                                           |
| ASSF <u>S</u> CGSSR                       | Carbamidomethyl: 6        | gi 125117; gi 164652870                        | RecName: Full=Keratin, type II microfibrillar, component 5    keratin 85 [Ovis aries]                                                                                                                                                     |
| EAE <u>C</u> VEADSGR                      | Carbamidomethyl: 4        | gi 312283588                                   | keratin 83 [Ovis aries]                                                                                                                                                                                                                   |
| TYQQ <u>S</u> CVSS <u>C</u> R             | Carbamidomethyl: 6, 10    | gi 999000018                                   | KAP 11.1 (tentative) cs39 [Ovis aries]                                                                                                                                                                                                    |
| <u>C</u> TRPI <u>C</u> EP <u>C</u> R      | Carbamidomethyl: 1, 6, 9  | gi 999000041                                   | KAP 2.3 var2 (tentative) cs39 [Ovis aries]                                                                                                                                                                                                |
| SS <u>C</u> SSRP <u>C</u> VPSS <u>C</u> R | Carbamidomethyl: 3, 8, 13 | gi 309323371                                   | keratin 34 [Ovis aries]                                                                                                                                                                                                                   |
| LG <u>C</u> GSGFR                         | Carbamidomethyl: 3        | gi 999000015                                   | KAP 19.5 (tentative) cs39 [Ovis aries]                                                                                                                                                                                                    |



|                   |                        |                                                              |                                                                                                                                                                                                                                                |
|-------------------|------------------------|--------------------------------------------------------------|------------------------------------------------------------------------------------------------------------------------------------------------------------------------------------------------------------------------------------------------|
| CGPCNSYVR         | Carbamidomethyl: 1, 4  | gi 164652864                                                 | keratin 31 [Ovis aries]                                                                                                                                                                                                                        |
| SLGSGYGCGR        | Carbamidomethyl: 3, 9  | gi 224555998                                                 | keratin associated protein 6 [Ovis aries]                                                                                                                                                                                                      |
| SVSALGSCGPR       | Carbamidomethyl: 8     | gi 125117                                                    | RecName: Full=Keratin, type II microfibrillar, component 5                                                                                                                                                                                     |
| TFSSCSAVAPK       | Carbamidomethyl: 5     | gi 125117                                                    | RecName: Full=Keratin, type II microfibrillar, component 5                                                                                                                                                                                     |
| VGGSILGCK         | Carbamidomethyl: 8     | gi 312283584                                                 | hair keratin type II intermediate filament [Ovis aries]                                                                                                                                                                                        |
| CCISAAPYR         | Carbamidomethyl: 1, 2  | gi 125117                                                    | RecName: Full=Keratin, type II microfibrillar, component 5                                                                                                                                                                                     |
| AFSCVSACGPRPGR    | Carbamidomethyl: 4, 8  | gi 312283584; gi 312283588; gi 1308                          | hair keratin type II intermediate filament [Ovis aries]    keratin 83 [Ovis aries]    hair type II keratin intermediate filament protein [Ovis aries]                                                                                          |
| CGPCNTFVH         | Carbamidomethyl: 1, 4  | gi 999000014                                                 | IFP Type I K33a var1 (tentative) cs39 [Ovis aries]                                                                                                                                                                                             |
| AFSCVSACGPR       | Carbamidomethyl: 4, 8  | gi 312283588; gi 1308                                        | keratin 83 [Ovis aries]    hair type II keratin intermediate filament protein [Ovis aries]                                                                                                                                                     |
| CCITAAPYR         | Carbamidomethyl: 1, 2  | gi 312283584; gi 312283588; gi 1308                          | hair keratin type II intermediate filament [Ovis aries]    keratin 83 [Ovis aries]    hair type II keratin intermediate filament protein [Ovis aries]                                                                                          |
| LECEINTYR         | Carbamidomethyl: 3     | gi 164652864; gi 999000014                                   | keratin 31 [Ovis aries]    IFP Type I K33a var1 (tentative) cs39 [Ovis aries]                                                                                                                                                                  |
| ARLECEINTYR       | Carbamidomethyl: 5     | gi 164652864; gi 999000014                                   | keratin 31 [Ovis aries]    IFP Type I K33a var1 (tentative) cs39 [Ovis aries]                                                                                                                                                                  |
| GGVACGGLTYSSTAGR  | Carbamidomethyl: 5     | gi 125117; gi 164652870                                      | RecName: Full=Keratin, type II microfibrillar, component 5    keratin 85 [Ovis aries]                                                                                                                                                          |
| DVDCAYLR          | Carbamidomethyl: 4     | gi 312283584; gi 1308; gi 125117; gi 164652870               | hair keratin type II intermediate filament [Ovis aries]    hair type II keratin intermediate filament protein [Ovis aries]    RecName: Full=Keratin, type II microfibrillar, component 5    keratin 85 [Ovis aries]                            |
| LGCGYGCYGYGSR     | Carbamidomethyl: 3, 7  | gi 224555998                                                 | keratin associated protein 6 [Ovis aries]                                                                                                                                                                                                      |
| LPSNPCATTNASSNFCR | Carbamidomethyl: 6, 16 | gi 309323371                                                 | keratin 34 [Ovis aries]                                                                                                                                                                                                                        |
| NLEIDPNAQCVK      | Carbamidomethyl: 10    | gi 312283584; gi 312283588; gi 1308; gi 125117               | hair keratin type II intermediate filament [Ovis aries]    keratin 83 [Ovis aries]    hair type II keratin intermediate filament protein [Ovis aries]    RecName: Full=Keratin, type II microfibrillar, component 5                            |
| QDMACLK           | Carbamidomethyl: 5     | gi 312283584; gi 312283588; gi 1308; gi 125117; gi 164652870 | hair keratin type II intermediate filament [Ovis aries]    keratin 83 [Ovis aries]    hair type II keratin intermediate filament protein [Ovis aries]    RecName: Full=Keratin, type II microfibrillar, component 5    keratin 85 [Ovis aries] |

|                            |                        |                                                        |                                                                                                                                      |
|----------------------------|------------------------|--------------------------------------------------------|--------------------------------------------------------------------------------------------------------------------------------------|
| T_CGFSTVGSFGSR             | Carbamidomethyl: 2     | gi 312283588                                           | keratin 83 [Ovis aries]                                                                                                              |
| AVPAFSCVSA_CGPR            | Carbamidomethyl: 7, 11 | gi 312283584                                           | hair keratin type II intermediate filament [Ovis aries]                                                                              |
| C_DSDILPLR                 | Carbamidomethyl: 1     | gi 999000051                                           | Leucine Rich Repeat Containing 15 Partial (tentative) cs39 [Ovis aries]                                                              |
| L_CEGVGAVNV_CVSSSR         | Carbamidomethyl: 2, 11 | gi 312283584; gi 312283588                             | hair keratin type II intermediate filament [Ovis aries]    keratin 83 [Ovis aries]                                                   |
| ILDELT_LCK                 | Carbamidomethyl: 8     | gi 164652864; gi 309323371; gi 312283590; gi 999000014 | keratin 31 [Ovis aries]    keratin 34 [Ovis aries]    keratin 33B [Ovis aries]    IFP Type I K33a var1 (tentative) cs39 [Ovis aries] |
| ILDDLTL_LCK                | Carbamidomethyl: 8     | gi 168693435                                           | keratin, type I cuticular Ha5 [Ovis aries]                                                                                           |
| YSGSS_CGSSFPNLYVR          | Carbamidomethyl: 6     | gi 999000030                                           | KAP 13.1 (tentative) cs39 [Ovis aries]                                                                                               |
| VESLKEELI_CCLK             | Carbamidomethyl: 10    | gi 164652864; gi 312283590; gi 999000014               | keratin 31 [Ovis aries]    keratin 33B [Ovis aries]    IFP Type I K33a var1 (tentative) cs39 [Ovis aries]                            |
| VESLKEELL_CCLK             | Carbamidomethyl: 10    | gi 309323371; gi 168693435                             | keratin 34 [Ovis aries]    keratin, type I cuticular Ha5 [Ovis aries]                                                                |
| PLTFISSG_CQPLSGVSTV_CKPVVR | Carbamidomethyl: 9, 19 | gi 999000018                                           | KAP 11.1 (tentative) cs39 [Ovis aries]                                                                                               |
| SGQSLSFQPT_CGSGFY          | Carbamidomethyl: 11    | gi 999000030                                           | KAP 13.1 (tentative) cs39 [Ovis aries]                                                                                               |
| DLNMD_CVVAEIK              | Carbamidomethyl: 6     | gi 125117; gi 164652870                                | RecName: Full=Keratin, type II microfibrillar, component 5    keratin 85 [Ovis aries]                                                |
| DLNMD_CIVAIEIK             | Carbamidomethyl: 6     | gi 312283588                                           | keratin 83 [Ovis aries]                                                                                                              |
| Q_CCESNLEPLFSGYIETLRR      | Carbamidomethyl: 2, 3  | gi 312283584; gi 1308                                  | hair keratin type II intermediate filament [Ovis aries]    hair type II keratin intermediate filament protein [Ovis aries]           |
| C_CCESNLEPLFNGYIETLR       | Carbamidomethyl: 1, 2  | gi 125117; gi 164652870                                | RecName: Full=Keratin, type II microfibrillar, component 5    keratin 85 [Ovis aries]                                                |
| Q_CCESNLEPLFSGYIETLR       | Carbamidomethyl: 2, 3  | gi 312283584; gi 1308                                  | hair keratin type II intermediate filament [Ovis aries]    hair type II keratin intermediate filament protein [Ovis aries]           |
| Q_CCESNLEPLFEGYIETLR       | Carbamidomethyl: 2, 3  | gi 312283588                                           | keratin 83 [Ovis aries]                                                                                                              |
| SDLEAQVESLKEELI_CCLK       | Carbamidomethyl: 16    | gi 164652864; gi 312283590                             | keratin 31 [Ovis aries]    keratin 33B [Ovis aries]                                                                                  |
| SDLEAQVESLKEELL_CCLK       | Carbamidomethyl: 16    | gi 309323371                                           | keratin 34 [Ovis aries]                                                                                                              |
| ADLEAQVESLKEELL_CCLK       | Carbamidomethyl: 16    | gi 168693435                                           | keratin, type I cuticular Ha5 [Ovis aries]                                                                                           |
| YSCQLNQVQSLISNVESQLAEIR    | Carbamidomethyl: 3     | gi 164652864                                           | keratin 31 [Ovis aries]                                                                                                              |
| YSCQLSQVQSLIVNVESQLAEIR    | Carbamidomethyl: 3     | gi 312283590                                           | keratin 33B [Ovis aries]                                                                                                             |

## Supplementary Table 5 - Sample 2b

Supplementary Table 5

| <b>Sample 2b stretch to break -1</b> |                        |                            |                                                                                    |
|--------------------------------------|------------------------|----------------------------|------------------------------------------------------------------------------------|
| <b>Sequence</b>                      | <b>Modifications</b>   | <b>Accessions</b>          | <b>Proteins</b>                                                                    |
| ASSFSCGSSR                           | Carbamidomethyl: 6     | gi 125117                  | RecName: Full=Keratin, type II microfibrillar, component 5                         |
| CGPCNSYVR                            | Carbamidomethyl: 1, 4  | gi 999000013               | IFP Type I K31 var1 (tentative) cs39 [Ovis aries]                                  |
| SVSALGSCGPR                          | Carbamidomethyl: 8     | gi 125117                  | RecName: Full=Keratin, type II microfibrillar, component 5                         |
| TFSSCSAVAPK                          | Carbamidomethyl: 5     | gi 125117                  | RecName: Full=Keratin, type II microfibrillar, component 5                         |
| SLCGSGYGYGSR                         | Carbamidomethyl: 3     | gi 999000021               | KAP 6.1 (tentative) cs39 [Ovis aries]                                              |
| AFSCVSACGPRPGR                       | Carbamidomethyl: 4, 8  | gi 312283584; gi 312283588 | hair keratin type II intermediate filament [Ovis aries]    keratin 83 [Ovis aries] |
| VGGSLGCK                             | Carbamidomethyl: 8     | gi 312283584               | hair keratin type II intermediate filament [Ovis aries]                            |
| CCITAAPYR                            | Carbamidomethyl: 1, 2  | gi 312283584; gi 312283588 | hair keratin type II intermediate filament [Ovis aries]    keratin 83 [Ovis aries] |
| LGCYGCYGYGSR                         | Carbamidomethyl: 3, 7  | gi 999000021               | KAP 6.1 (tentative) cs39 [Ovis aries]                                              |
| TGCFSTVGSFGSR                        | Carbamidomethyl: 2     | gi 312283588               | keratin 83 [Ovis aries]                                                            |
| SGQSLFQPTCGSGFY                      | Carbamidomethyl: 11    | gi 999000030               | KAP 13.1 (tentative) cs39 [Ovis aries]                                             |
| <b>Sample 2b stretch to break -2</b> |                        |                            |                                                                                    |
| <b>Sequence</b>                      | <b>Modifications</b>   | <b>Accessions</b>          | <b>Proteins</b>                                                                    |
| ASSFSCGSSR                           | Carbamidomethyl: 6     | gi 125117                  | RecName: Full=Keratin, type II microfibrillar, component 5                         |
| TGPATTICSSDK                         | Carbamidomethyl: 8     | gi 229307                  | keratin SCMKIIB2                                                                   |
| SRFGPCNTSGC                          | Carbamidomethyl: 6, 11 | gi 312283590               | keratin 33B [Ovis aries]                                                           |
| LGCGSGFR                             | Carbamidomethyl: 3     | gi 999000015               | KAP 19.5 (tentative) cs39 [Ovis aries]                                             |
| CGPCNSYVR                            | Carbamidomethyl: 1, 4  | gi 999000013               | IFP Type I K31 var1 (tentative) cs39 [Ovis aries]                                  |
| TRCGPCNTFVH                          | Carbamidomethyl: 3, 6  | gi 312283592               | keratin 33 [Ovis aries]                                                            |

|                                      |                                     |                            |                                                                                                                            |
|--------------------------------------|-------------------------------------|----------------------------|----------------------------------------------------------------------------------------------------------------------------|
| TFSSCSAVAPK                          | Carbamidomethyl: 5                  | gi 125117                  | RecName: Full=Keratin, type II microfibrillar, component 5                                                                 |
| SVSALGSCGPR                          | Carbamidomethyl: 8                  | gi 125117                  | RecName: Full=Keratin, type II microfibrillar, component 5                                                                 |
| SLCGSGYGYGSR                         | Carbamidomethyl: 3                  | gi 999000021               | KAP 6.1 (tentative) cs39 [Ovis aries]                                                                                      |
| CGPCNTFVH                            | Carbamidomethyl: 1, 4               | gi 312283592               | keratin 33 [Ovis aries]                                                                                                    |
| AFSCVSACGPRPGR                       | Carbamidomethyl: 4, 8               | gi 312283584; gi 312283588 | hair keratin type II intermediate filament [Ovis aries]    keratin 83 [Ovis aries]                                         |
| VGGSILGCK                            | Carbamidomethyl: 8                  | gi 312283584               | hair keratin type II intermediate filament [Ovis aries]                                                                    |
| CCITAAPYR                            | Carbamidomethyl: 1; Propionamide: 2 | gi 312283584; gi 312283588 | hair keratin type II intermediate filament [Ovis aries]    keratin 83 [Ovis aries]                                         |
| CCITAAPYR                            | Carbamidomethyl: 1, 2               | gi 312283584; gi 312283588 | hair keratin type II intermediate filament [Ovis aries]    keratin 83 [Ovis aries]                                         |
| TGPATTICSSDKFCR                      | Carbamidomethyl: 8, 14              | gi 229307                  | keratin SCMKIIB2                                                                                                           |
| GGVACGGLTYSSTAGR                     | Carbamidomethyl: 5                  | gi 125117                  | RecName: Full=Keratin, type II microfibrillar, component 5                                                                 |
| LGCGYGCGYGYGSR                       | Carbamidomethyl: 3, 7               | gi 999000021               | KAP 6.1 (tentative) cs39 [Ovis aries]                                                                                      |
| TCGFSTVGSFGSR                        | Carbamidomethyl: 2                  | gi 312283588               | keratin 83 [Ovis aries]                                                                                                    |
| CCITAAPYRGISCYR                      | Carbamidomethyl: 1, 2, 13           | gi 312283584; gi 312283588 | hair keratin type II intermediate filament [Ovis aries]    keratin 83 [Ovis aries]                                         |
| YSGSSCGSSFPSNLVYR                    | Carbamidomethyl: 6                  | gi 999000030               | KAP 13.1 (tentative) cs39 [Ovis aries]                                                                                     |
| SGQSLSFQPTCGSGFY                     | Carbamidomethyl: 11                 | gi 999000030               | KAP 13.1 (tentative) cs39 [Ovis aries]                                                                                     |
|                                      |                                     |                            |                                                                                                                            |
| <b>Sample 2b stretch to break -3</b> |                                     |                            |                                                                                                                            |
| <b>Sequence</b>                      | <b>Modifications</b>                | <b>Accessions</b>          | <b>Proteins</b>                                                                                                            |
| EAECAEADSGR                          | Carbamidomethyl: 4                  | gi 312283584; gi 1308      | hair keratin type II intermediate filament [Ovis aries]    hair type II keratin intermediate filament protein [Ovis aries] |
| ASSFSCGSSR                           | Carbamidomethyl: 6                  | gi 125117                  | RecName: Full=Keratin, type II microfibrillar, component 5                                                                 |
| CPSSFGR                              | Carbamidomethyl: 1                  | gi 999000016               | KAP 19.3 (tentative) cs39 [Ovis aries]                                                                                     |
| EAEQVEADSGR                          | Carbamidomethyl: 4                  | gi 312283588               | keratin 83 [Ovis aries]                                                                                                    |
| SVSALGSCGPR                          | Carbamidomethyl: 8                  | gi 125117                  | RecName: Full=Keratin, type II microfibrillar, component 5                                                                 |
| VGGSILGCK                            | Carbamidomethyl: 8                  | gi 312283584               | hair keratin type II intermediate filament [Ovis aries]                                                                    |

|                                      |                        |                                                |                                                                                                                                                                                                                     |
|--------------------------------------|------------------------|------------------------------------------------|---------------------------------------------------------------------------------------------------------------------------------------------------------------------------------------------------------------------|
| CCISAAPYR                            | Carbamidomethyl: 1, 2  | gi 125117                                      | RecName: Full=Keratin, type II microfibrillar, component 5                                                                                                                                                          |
| CCITAAPYR                            | Carbamidomethyl: 1, 2  | gi 312283584; gi 1308; gi 312283588            | hair keratin type II intermediate filament [Ovis aries]    hair type II keratin intermediate filament protein [Ovis aries]    keratin 83 [Ovis aries]                                                               |
| LECEINTYR                            | Carbamidomethyl: 3     | gi 999000013                                   | IFP Type I K31 var1 (tentative) cs39 [Ovis aries]                                                                                                                                                                   |
| DVDCAYLRL                            | Carbamidomethyl: 4     | gi 312283584; gi 1308; gi 125117               | hair keratin type II intermediate filament [Ovis aries]    hair type II keratin intermediate filament protein [Ovis aries]    RecName: Full=Keratin, type II microfibrillar, component 5                            |
| LPSNPCATTNASSNFCR                    | Carbamidomethyl: 6, 16 | gi 426238003                                   | PREDICTED: keratin 34 [Ovis aries]                                                                                                                                                                                  |
| QDMACLK                              | Carbamidomethyl: 5     | gi 312283584; gi 1308; gi 125117; gi 312283588 | hair keratin type II intermediate filament [Ovis aries]    hair type II keratin intermediate filament protein [Ovis aries]    RecName: Full=Keratin, type II microfibrillar, component 5    keratin 83 [Ovis aries] |
| TGCFSTVGSFGSR                        | Carbamidomethyl: 2     | gi 312283588                                   | keratin 83 [Ovis aries]                                                                                                                                                                                             |
| ILDELTCLK                            | Carbamidomethyl: 8     | gi 426238003; gi 312283590; gi 999000013       | PREDICTED: keratin 34 [Ovis aries]    keratin 33B [Ovis aries]    IFP Type I K31 var1 (tentative) cs39 [Ovis aries]                                                                                                 |
| YSGSSCGSSFPSNLVYR                    | Carbamidomethyl: 6     | gi 999000030                                   | KAP 13.1 (tentative) cs39 [Ovis aries]                                                                                                                                                                              |
| DLNMDCVVAEIK                         | Carbamidomethyl: 6     | gi 125117                                      | RecName: Full=Keratin, type II microfibrillar, component 5                                                                                                                                                          |
| DLNMDCIVAEIK                         | Carbamidomethyl: 6     | gi 312283588                                   | keratin 83 [Ovis aries]                                                                                                                                                                                             |
| SDLEAQVESLKEELCLK                    | Carbamidomethyl: 16    | gi 312283590; gi 999000013                     | keratin 33B [Ovis aries]    IFP Type I K31 var1 (tentative) cs39 [Ovis aries]                                                                                                                                       |
| SDLEAQVESLKEELLCLK                   | Carbamidomethyl: 16    | gi 426238003                                   | PREDICTED: keratin 34 [Ovis aries]                                                                                                                                                                                  |
| ADLEAQVESLKEELLCLK                   | Carbamidomethyl: 16    | gi 168693435                                   | keratin, type I cuticular Ha5 [Ovis aries]                                                                                                                                                                          |
| YSCQLNQVQSLISNVESQLAEIR              | Carbamidomethyl: 3     | gi 999000013                                   | IFP Type I K31 var1 (tentative) cs39 [Ovis aries]                                                                                                                                                                   |
| YSCQLSQVQSLIVNVESQLAEIR              | Carbamidomethyl: 3     | gi 312283590                                   | keratin 33B [Ovis aries]                                                                                                                                                                                            |
|                                      |                        |                                                |                                                                                                                                                                                                                     |
| <b>Sample 2b stretch to break -4</b> |                        |                                                |                                                                                                                                                                                                                     |
| <b>Sequence</b>                      | <b>Modifications</b>   | <b>Accessions</b>                              | <b>Proteins</b>                                                                                                                                                                                                     |
| EAECAEADSGR                          | Carbamidomethyl: 4     | gi 312283584; gi 1308                          | hair keratin type II intermediate filament [Ovis aries]    hair type II keratin intermediate filament protein [Ovis aries]                                                                                          |
| ASSFSCGSSR                           | Carbamidomethyl: 6     | gi 246276                                      | type II intermediate-filament protein component 5 [sheep, wool, Peptide, 503 aa]                                                                                                                                    |

|                  |                           |                                                |                                                                                                                                                                                                                |
|------------------|---------------------------|------------------------------------------------|----------------------------------------------------------------------------------------------------------------------------------------------------------------------------------------------------------------|
| PTSCQPAPCR       | Carbamidomethyl: 4, 9     | gi 999000041                                   | KAP 2.3 var2 (tentative) cs39 [Ovis aries]                                                                                                                                                                     |
| EAECEADSGR       | Carbamidomethyl: 4        | gi 312283588                                   | keratin 83 [Ovis aries]                                                                                                                                                                                        |
| SVCGGFR          | Carbamidomethyl: 3        | gi 312283584; gi 1308; gi 312283588            | hair keratin type II intermediate filament [Ovis aries]    hair type II keratin intermediate filament protein [Ovis aries]    keratin 83 [Ovis aries]                                                          |
| SSCSSRPCVPSSCR   | Carbamidomethyl: 3, 8, 13 | gi 309323371                                   | keratin 34 [Ovis aries]                                                                                                                                                                                        |
| LGCGSGFR         | Carbamidomethyl: 3        | gi 999000015                                   | KAP 19.5 (tentative) cs39 [Ovis aries]                                                                                                                                                                         |
| CGPCNSYVR        | Carbamidomethyl: 1, 4     | gi 999000013                                   | IFP Type I K31 var1 (tentative) cs39 [Ovis aries]                                                                                                                                                              |
| SVSALGSCGPR      | Carbamidomethyl: 8        | gi 246276                                      | type II intermediate-filament protein component 5 [sheep, wool, Peptide, 503 aa]                                                                                                                               |
| TFSSCSAVAPK      | Carbamidomethyl: 5        | gi 246276                                      | type II intermediate-filament protein component 5 [sheep, wool, Peptide, 503 aa]                                                                                                                               |
| DVDCAAYVR        | Carbamidomethyl: 4        | gi 312283588                                   | keratin 83 [Ovis aries]                                                                                                                                                                                        |
| AFSCVSACGPRPGR   | Carbamidomethyl: 4, 8     | gi 312283584; gi 1308; gi 312283588            | hair keratin type II intermediate filament [Ovis aries]    hair type II keratin intermediate filament protein [Ovis aries]    keratin 83 [Ovis aries]                                                          |
| VGGSilGCK        | Carbamidomethyl: 8        | gi 312283584                                   | hair keratin type II intermediate filament [Ovis aries]                                                                                                                                                        |
| CCISAAPYR        | Carbamidomethyl: 1, 2     | gi 246276                                      | type II intermediate-filament protein component 5 [sheep, wool, Peptide, 503 aa]                                                                                                                               |
| CGPCNTFVH        | Carbamidomethyl: 1, 4     | gi 999000014                                   | IFP Type I K33a var1 (tentative) cs39 [Ovis aries]                                                                                                                                                             |
| TQTVVSSPCQTSYRPR | Carbamidomethyl: 9, 13    | gi 999000030                                   | KAP 13.1 (tentative) cs39 [Ovis aries]                                                                                                                                                                         |
| AFSCVSACGPR      | Carbamidomethyl: 4, 8     | gi 1308; gi 312283588                          | hair type II keratin intermediate filament protein [Ovis aries]    keratin 83 [Ovis aries]                                                                                                                     |
| CCITAAPYR        | Carbamidomethyl: 1, 2     | gi 312283584; gi 1308; gi 312283588            | hair keratin type II intermediate filament [Ovis aries]    hair type II keratin intermediate filament protein [Ovis aries]    keratin 83 [Ovis aries]                                                          |
| LECEINTYR        | Carbamidomethyl: 3        | gi 999000013; gi 999000014                     | IFP Type I K31 var1 (tentative) cs39 [Ovis aries]    IFP Type I K33a var1 (tentative) cs39 [Ovis aries]                                                                                                        |
| GGVACGGLTYSSTAGR | Carbamidomethyl: 5        | gi 246276                                      | type II intermediate-filament protein component 5 [sheep, wool, Peptide, 503 aa]                                                                                                                               |
| DVDCAYLRL        | Carbamidomethyl: 4        | gi 312283584; gi 246276; gi 1308               | hair keratin type II intermediate filament [Ovis aries]    type II intermediate-filament protein component 5 [sheep, wool, Peptide, 503 aa]    hair type II keratin intermediate filament protein [Ovis aries] |
| ARLECEINTYR      | Carbamidomethyl: 5        | gi 999000013; gi 999000014                     | IFP Type I K31 var1 (tentative) cs39 [Ovis aries]    IFP Type I K33a var1 (tentative) cs39 [Ovis aries]                                                                                                        |
| QDMACLKK         | Carbamidomethyl: 5        | gi 312283584; gi 246276; gi 1308; gi 312283588 | hair keratin type II intermediate filament [Ovis aries]    type II intermediate-filament protein                                                                                                               |

|                                                                           |                                |                                                        |                                                                                                                                                                |
|---------------------------------------------------------------------------|--------------------------------|--------------------------------------------------------|----------------------------------------------------------------------------------------------------------------------------------------------------------------|
|                                                                           |                                |                                                        | component 5 [sheep, wool, Peptide, 503 aa]    hair type II keratin intermediate filament protein [Ovis aries]    keratin 83 [Ovis aries]                       |
| AVPAFSCVSA <sup>C</sup> GPRPGR                                            | Carbamidomethyl: 7, 11         | gi 312283584                                           | hair keratin type II intermediate filament [Ovis aries]                                                                                                        |
| T <sup>C</sup> GFSTVGS <sup>G</sup> FGSR                                  | Carbamidomethyl: 2             | gi 312283588                                           | keratin 83 [Ovis aries]                                                                                                                                        |
| AVPAFSCVSA <sup>C</sup> GPR                                               | Carbamidomethyl: 7, 11         | gi 312283584                                           | hair keratin type II intermediate filament [Ovis aries]                                                                                                        |
| L <sup>C</sup> EGVGSVNV <sup>C</sup> VSSSR                                | Carbamidomethyl: 2, 11         | gi 246276; gi 1308                                     | type II intermediate-filament protein component 5 [sheep, wool, Peptide, 503 aa]    hair type II keratin intermediate filament protein [Ovis aries]            |
| L <sup>C</sup> EGVGAVNV <sup>C</sup> VSSSR                                | Carbamidomethyl: 2, 11         | gi 312283584; gi 312283588                             | hair keratin type II intermediate filament [Ovis aries]    keratin 83 [Ovis aries]                                                                             |
| ILDDLTL <sup>C</sup> K                                                    | Carbamidomethyl: 8             | gi 168693435                                           | keratin, type I cuticular Ha5 [Ovis aries]                                                                                                                     |
| ILDELT <sup>C</sup> K                                                     | Carbamidomethyl: 8             | gi 999000013; gi 312283590; gi 309323371; gi 999000014 | IFP Type I K31 var1 (tentative) cs39 [Ovis aries]    keratin 33B [Ovis aries]    keratin 34 [Ovis aries]    IFP Type I K33a var1 (tentative) cs39 [Ovis aries] |
| YSGSS <sup>C</sup> GSSFPSNLVYR                                            | Carbamidomethyl: 6             | gi 999000030                                           | KAP 13.1 (tentative) cs39 [Ovis aries]                                                                                                                         |
| TITPC <sup>I</sup> SSPC <sup>A</sup> AP <sup>A</sup> CTPC <sup>V</sup> PR | Carbamidomethyl: 5, 10, 16, 19 | gi 999000013                                           | IFP Type I K31 var1 (tentative) cs39 [Ovis aries]                                                                                                              |
| SQQQE <sup>L</sup> LLCPNYQSYFR                                            | Carbamidomethyl: 9             | gi 309323371                                           | keratin 34 [Ovis aries]                                                                                                                                        |
| DLNMD <sup>C</sup> VVAEIK                                                 | Carbamidomethyl: 6             | gi 246276                                              | type II intermediate-filament protein component 5 [sheep, wool, Peptide, 503 aa]                                                                               |
| DLNMD <sup>C</sup> VVAEIK                                                 | Propionamide: 6                | gi 246276                                              | type II intermediate-filament protein component 5 [sheep, wool, Peptide, 503 aa]                                                                               |
| QCCESNLEPLFEGYIETLRR                                                      | Carbamidomethyl: 2, 3          | gi 312283588                                           | keratin 83 [Ovis aries]                                                                                                                                        |
| SDLEAQVESLKEELL <sup>C</sup> LK                                           | Carbamidomethyl: 16            | gi 309323371                                           | keratin 34 [Ovis aries]                                                                                                                                        |
| SDLEAQVESLKEELI <sup>C</sup> LK                                           | Carbamidomethyl: 16            | gi 999000013; gi 312283590                             | IFP Type I K31 var1 (tentative) cs39 [Ovis aries]    keratin 33B [Ovis aries]                                                                                  |
| ADLEAQVESLKEELL <sup>C</sup> LK                                           | Carbamidomethyl: 16            | gi 168693435                                           | keratin, type I cuticular Ha5 [Ovis aries]                                                                                                                     |
| YSC <sup>L</sup> QLSQVQLIVNVESQLAEIR                                      | Carbamidomethyl: 3             | gi 312283590                                           | keratin 33B [Ovis aries]                                                                                                                                       |
| YSC <sup>L</sup> QLNQVQLIVSVESQLAEIR                                      | Carbamidomethyl: 3             | gi 999000014                                           | IFP Type I K33a var1 (tentative) cs39 [Ovis aries]                                                                                                             |
|                                                                           |                                |                                                        |                                                                                                                                                                |
| <b>Sample 2b stretch to break -5</b>                                      |                                |                                                        |                                                                                                                                                                |
| <b>Sequence</b>                                                           | <b>Modifications</b>           | <b>Accessions</b>                                      | <b>Proteins</b>                                                                                                                                                |
| ASSFSC <sup>G</sup> SSR                                                   | Carbamidomethyl: 6             | gi 246276                                              | type II intermediate-filament protein component 5 [sheep, wool, Peptide, 503 aa]                                                                               |

|                   |                        |                                                      |                                                                                                                                                                                                                      |
|-------------------|------------------------|------------------------------------------------------|----------------------------------------------------------------------------------------------------------------------------------------------------------------------------------------------------------------------|
| EAEQVEADSGR       | Carbamidomethyl: 4     | gi 312283588                                         | keratin 83 [Ovis aries]                                                                                                                                                                                              |
| SVCGGFR           | Carbamidomethyl: 3     | gi 312283584; gi 312283588; gi 1308;<br>gi 426226636 | hair keratin type II intermediate filament [Ovis aries]    keratin 83 [Ovis aries]    hair type II keratin intermediate filament protein [Ovis aries]    PREDICTED: keratin, type II cuticular Hb3-like [Ovis aries] |
| TYQSCVSSCR        | Carbamidomethyl: 6, 10 | gi 999000018                                         | KAP 11.1 (tentative) cs39 [Ovis aries]                                                                                                                                                                               |
| CGPCNSYVR         | Carbamidomethyl: 1, 4  | gi 125090                                            | RecName: Full=Keratin, type I microfibrillar 48 kDa, component 8C-1; AltName: Full=Low-sulfur keratin                                                                                                                |
| TGPATTICSSDK      | Carbamidomethyl: 8     | gi 229307                                            | keratin SCMKIIB2                                                                                                                                                                                                     |
| SVSALGSCGPR       | Carbamidomethyl: 8     | gi 246276                                            | type II intermediate-filament protein component 5 [sheep, wool, Peptide, 503 aa]                                                                                                                                     |
| TFSSCSAVAPK       | Carbamidomethyl: 5     | gi 246276                                            | type II intermediate-filament protein component 5 [sheep, wool, Peptide, 503 aa]                                                                                                                                     |
| DVDCAAYVR         | Carbamidomethyl: 4     | gi 312283588                                         | keratin 83 [Ovis aries]                                                                                                                                                                                              |
| VGGSILGCK         | Carbamidomethyl: 8     | gi 312283584                                         | hair keratin type II intermediate filament [Ovis aries]                                                                                                                                                              |
| CCISAAPYR         | Carbamidomethyl: 1, 2  | gi 246276                                            | type II intermediate-filament protein component 5 [sheep, wool, Peptide, 503 aa]                                                                                                                                     |
| CCITAAPYR         | Carbamidomethyl: 1, 2  | gi 312283584; gi 312283588; gi 1308;<br>gi 426226636 | hair keratin type II intermediate filament [Ovis aries]    keratin 83 [Ovis aries]    hair type II keratin intermediate filament protein [Ovis aries]    PREDICTED: keratin, type II cuticular Hb3-like [Ovis aries] |
| AFSCVSACGPR       | Carbamidomethyl: 4, 8  | gi 312283588; gi 1308; gi 426226636                  | keratin 83 [Ovis aries]    hair type II keratin intermediate filament protein [Ovis aries]    PREDICTED: keratin, type II cuticular Hb3-like [Ovis aries]                                                            |
| LECEINTYR         | Carbamidomethyl: 3     | gi 125090                                            | RecName: Full=Keratin, type I microfibrillar 48 kDa, component 8C-1; AltName: Full=Low-sulfur keratin                                                                                                                |
| TGPATTICSSDKFCR   | Carbamidomethyl: 8, 14 | gi 229307                                            | keratin SCMKIIB2                                                                                                                                                                                                     |
| GGVACGGGLTYSSTAGR | Carbamidomethyl: 5     | gi 246276                                            | type II intermediate-filament protein component 5 [sheep, wool, Peptide, 503 aa]                                                                                                                                     |
| ARLECEINTYR       | Carbamidomethyl: 5     | gi 125090                                            | RecName: Full=Keratin, type I microfibrillar 48 kDa, component 8C-1; AltName: Full=Low-sulfur keratin                                                                                                                |
| DVDCAYLRL         | Carbamidomethyl: 4     | gi 312283584; gi 1308; gi 246276                     | hair keratin type II intermediate filament [Ovis aries]    hair type II keratin intermediate filament protein [Ovis aries]    type II intermediate-                                                                  |



|                                                   |                        |                                                              |                                                                                                                                                                                                                                                                                                          |
|---------------------------------------------------|------------------------|--------------------------------------------------------------|----------------------------------------------------------------------------------------------------------------------------------------------------------------------------------------------------------------------------------------------------------------------------------------------------------|
|                                                   |                        |                                                              | filament protein component 5 [sheep, wool, Peptide, 503 aa]                                                                                                                                                                                                                                              |
| LGCGYGCGYGYGSR                                    | Carbamidomethyl: 3, 7  | gi 999000021                                                 | KAP 6.1 (tentative) cs39 [Ovis aries]                                                                                                                                                                                                                                                                    |
| SFSA <sub>C</sub> SVGLGK                          | Carbamidomethyl: 5     | gi 168693435                                                 | keratin, type I cuticular Ha5 [Ovis aries]                                                                                                                                                                                                                                                               |
| QDMA <sub>C</sub> LLK                             | Carbamidomethyl: 5     | gi 312283584; gi 312283588; gi 1308; gi 246276; gi 426226636 | hair keratin type II intermediate filament [Ovis aries]    keratin 83 [Ovis aries]    hair type II keratin intermediate filament protein [Ovis aries]    type II intermediate-filament protein component 5 [sheep, wool, Peptide, 503 aa]    PREDICTED: keratin, type II cuticular Hb3-like [Ovis aries] |
| AVPAFSC <sub>V</sub> SAC <sub>G</sub> PRPGR       | Carbamidomethyl: 7, 11 | gi 312283584                                                 | hair keratin type II intermediate filament [Ovis aries]                                                                                                                                                                                                                                                  |
| T <sub>C</sub> GFSTVGSFGSR                        | Carbamidomethyl: 2     | gi 312283588                                                 | keratin 83 [Ovis aries]                                                                                                                                                                                                                                                                                  |
| AVPAFSC <sub>V</sub> SAC <sub>G</sub> PR          | Carbamidomethyl: 7, 11 | gi 312283584                                                 | hair keratin type II intermediate filament [Ovis aries]                                                                                                                                                                                                                                                  |
| L <sub>C</sub> EGVGAVNV <sub>C</sub> VSSSR        | Carbamidomethyl: 2, 11 | gi 312283584; gi 312283588                                   | hair keratin type II intermediate filament [Ovis aries]    keratin 83 [Ovis aries]                                                                                                                                                                                                                       |
| RILDELTL <sub>C</sub> K                           | Carbamidomethyl: 9     | gi 125090; gi 312283590; gi 309323371                        | RecName: Full=Keratin, type I microfibrillar 48 kDa, component 8C-1; AltName: Full=Low-sulfur keratin    keratin 33B [Ovis aries]    keratin 34 [Ovis aries]                                                                                                                                             |
| ILDDLTL <sub>C</sub> K                            | Carbamidomethyl: 8     | gi 168693435                                                 | keratin, type I cuticular Ha5 [Ovis aries]                                                                                                                                                                                                                                                               |
| ILDELTL <sub>C</sub> K                            | Carbamidomethyl: 8     | gi 125090; gi 312283590; gi 309323371                        | RecName: Full=Keratin, type I microfibrillar 48 kDa, component 8C-1; AltName: Full=Low-sulfur keratin    keratin 33B [Ovis aries]    keratin 34 [Ovis aries]                                                                                                                                             |
| YSGSS <sub>C</sub> GSSFPSNLVYR                    | Carbamidomethyl: 6     | gi 999000030                                                 | KAP 13.1 (tentative) cs39 [Ovis aries]                                                                                                                                                                                                                                                                   |
| VESLKEELI <sub>C</sub> LK                         | Carbamidomethyl: 10    | gi 125090; gi 312283590                                      | RecName: Full=Keratin, type I microfibrillar 48 kDa, component 8C-1; AltName: Full=Low-sulfur keratin    keratin 33B [Ovis aries]                                                                                                                                                                        |
| VESLKEELL <sub>C</sub> LK                         | Carbamidomethyl: 10    | gi 309323371; gi 168693435                                   | keratin 34 [Ovis aries]    keratin, type I cuticular Ha5 [Ovis aries]                                                                                                                                                                                                                                    |
| SGQSLSFQPT <sub>C</sub> SGGFY                     | Carbamidomethyl: 11    | gi 999000030                                                 | KAP 13.1 (tentative) cs39 [Ovis aries]                                                                                                                                                                                                                                                                   |
| PLTFISSG <sub>C</sub> QPLSGVSTV <sub>C</sub> KPVR | Carbamidomethyl: 9, 19 | gi 999000018                                                 | KAP 11.1 (tentative) cs39 [Ovis aries]                                                                                                                                                                                                                                                                   |
| DLNMD <sub>C</sub> VVAEIK                         | Carbamidomethyl: 6     | gi 246276                                                    | type II intermediate-filament protein component 5 [sheep, wool, Peptide, 503 aa]                                                                                                                                                                                                                         |
| DLNMD <sub>C</sub> IVAEIK                         | Carbamidomethyl: 6     | gi 312283588                                                 | keratin 83 [Ovis aries]                                                                                                                                                                                                                                                                                  |

|                                   |                       |                         |                                                                                                                                   |
|-----------------------------------|-----------------------|-------------------------|-----------------------------------------------------------------------------------------------------------------------------------|
| QCCESNLEPLFSGYIETLRR              | Carbamidomethyl: 2, 3 | gi 312283584; gi 1308   | hair keratin type II intermediate filament [Ovis aries]    hair type II keratin intermediate filament protein [Ovis aries]        |
| SDLEAQVESLKEELI <sup>16</sup> CLK | Carbamidomethyl: 16   | gi 125090; gi 312283590 | RecName: Full=Keratin, type I microfibrillar 48 kDa, component 8C-1; AltName: Full=Low-sulfur keratin    keratin 33B [Ovis aries] |
| SDLEAQVESLKEELL <sup>16</sup> CLK | Carbamidomethyl: 16   | gi 309323371            | keratin 34 [Ovis aries]                                                                                                           |
| QCCESNLEPLFEGYIETLR               | Carbamidomethyl: 2, 3 | gi 312283588            | keratin 83 [Ovis aries]                                                                                                           |
| ADLEAQVESLKEELL <sup>16</sup> CLK | Carbamidomethyl: 16   | gi 168693435            | keratin, type I cuticular Ha5 [Ovis aries]                                                                                        |
| YSCQLNQVQSLISNVESQLAEIR           | Carbamidomethyl: 3    | gi 125090               | RecName: Full=Keratin, type I microfibrillar 48 kDa, component 8C-1; AltName: Full=Low-sulfur keratin                             |
| YSCQLSQVQSLIVNVESQLAEIR           | Carbamidomethyl: 3    | gi 312283590            | keratin 33B [Ovis aries]                                                                                                          |

## Coloured version of summary Table 2

Peptides from which consistently labelled cysteines were detected in one or more of the 5 repeats of a treatment condition. Green shading indicates a statistical likelihood (\*, P<0.05; \*\* P<0.01; \*\*\* P<0.001) that labelling is a consistent effect of the treatment. Identified proteins from which peptides arise are highlighted as either keratins (blue) or KAPs (orange).

Supplementary Table 6

| Sequence                                                                                                                | Significance/conditions |          |              |          | Protein ID     | Position               | Region                                                 |
|-------------------------------------------------------------------------------------------------------------------------|-------------------------|----------|--------------|----------|----------------|------------------------|--------------------------------------------------------|
|                                                                                                                         | Wet                     |          | Dry (55% RH) |          |                |                        |                                                        |
|                                                                                                                         | 1a hold                 | 1b break | 2a hold      | 2b break |                |                        |                                                        |
| <b>A. Cysteines consistently labelled irrespective of conditions</b>                                                    |                         |          |              |          |                |                        |                                                        |
| A <sup>489</sup> SSFSCGSSR                                                                                              | 5***                    | 4**      | 5***         | 5***     | K85            | T-65                   | Tail domain                                            |
| C <sup>31</sup> CISAAPYR                                                                                                | 5***                    | 5***     | 4**          | 3*       | K85            | H-31, H-32             | Head domain                                            |
| <b>B. Cysteines consistently labelled when wet (hydrogen bonds disrupted)</b>                                           |                         |          |              |          |                |                        |                                                        |
| T <sup>12</sup> GPATTICSSDKFCR                                                                                          | 5***                    | 4**      | 2            | 2        | KAP3.2         | 19, 25                 | Close to N-terminus                                    |
| S <sup>98</sup> SSCSSLSSGSR                                                                                             | 4**                     | 3*       | 2            |          | KAP13.1 var1   | 102                    | In the middle (protein is 166 residues long)           |
| G <sup>25</sup> CGCGSFR                                                                                                 | 5***                    | 3*       | 1            |          | KAP19.5        | 26, 28                 | In the middle (protein is 72 residues long)            |
| T <sup>380</sup> ITPCISSPCAPAAPCTPCVPR                                                                                  | 5***                    | 5***     | 1            | 1        | K31            | T-22, T-27, T-33, T-36 | Close to C-terminus                                    |
| S <sup>394</sup> RFGPCNTSGC                                                                                             | 5***                    | 3*       | 2            | 1        | K33b           | T-37, T-42             | C-terminal peptide                                     |
| S <sup>53</sup> VCGGFR                                                                                                  | 4**                     | 3*       | 2            | 2        | K83            | H-55                   | Head domain                                            |
| V <sup>492</sup> GGSilGCKK                                                                                              | 5***                    | 5***     | 2            |          | K86-like       | T-70                   | C-terminus but one, terminal cysteine                  |
| <b>C. Cysteines consistently labelled when wet and stretched and held only</b>                                          |                         |          |              |          |                |                        |                                                        |
| L <sup>125</sup> GYGICGFPVLSSGSGFCQPTFFASR                                                                              | 4**                     |          |              |          | KAP13.1 var1   | 130                    | Close to the C-terminus (protein is 166 residues long) |
| T <sup>124</sup> FRTSPCC                                                                                                | 3*                      | 2        |              |          | KAP2.3 var3    | 130, 131               | C-terminal peptide                                     |
| T <sup>12</sup> GPATTICSSDKF                                                                                            | 3*                      |          | 1            |          | KAP3.2         | 19                     | Close to N-terminus                                    |
| <b>D. Cysteines consistently labelled only in dry condition (reinforcing hydrogen bonds present)</b>                    |                         |          |              |          |                |                        |                                                        |
| Y <sup>306</sup> SCQLSQVQLIVNVESQLAEIR                                                                                  |                         |          | 3*           | 3*       | K31, K33b      | 2-90                   | Coil 2B                                                |
| <b>E. Cysteines consistently labelled when dry and stretched and held only</b>                                          |                         |          |              |          |                |                        |                                                        |
| V <sup>179</sup> ESLKEELICLK                                                                                            |                         |          | 3*           | 1        | K31 var1, K33b | 1B-87                  | Coil 1B (Seq. number for K31)                          |
| V <sup>179</sup> ESLKEELLCLK                                                                                            |                         |          | 3*           | 1        | K34            | 1B-87                  | Coil 1B                                                |
| Y <sup>306</sup> SCQLNQVQLISNVESQLAEIR                                                                                  |                         |          | 3*           | 2        | K31, K33b      | 2-90                   | Coil 2B                                                |
| <b>F. Cysteines consistently labelled on prolonged stretching irrespective of water content</b>                         |                         |          |              |          |                |                        |                                                        |
| S <sup>121</sup> ISTVCQPVGGVSTICQPTCGVSR                                                                                | 5***                    | 2        | 3*           |          | KAP11.1        | 126, 136, 140          | Close to the C-terminus (residue 158)                  |
| <b>G. Cysteines consistently labelled only when fibre stretched to break and reinforced by hydrogen bonds</b>           |                         |          |              |          |                |                        |                                                        |
| A <sup>214</sup> DLEAQVESLKEELLCLK                                                                                      |                         |          | 1            | 3*       | K35            | 1B-87                  | Coil 1B                                                |
| <b>H. Cysteines consistently labelled when fibre was wet or stretched and held, but not when stretched to break dry</b> |                         |          |              |          |                |                        |                                                        |
| C <sup>395</sup> GPCNTFVH                                                                                               | 3*                      | 3*       | 3*           | 2        | K33a           | T-33, T-36             | Tail domain                                            |

## Fibre diameter distribution and other characteristics measured by OFDA method

Romney breed, Barry's Bay Sheep D was selected from wool from 10 sheep in the same flock because of its well-defined narrow distribution of fibre diameters when measured using the industry standard Optical Fibre Diameter Analyser (OFDA) method (Supplementary Supplementary Figure 1 and Supplementary Supplementary Table 7).

The table below contains measurement categories used in the wool industry in New Zealand. The key values for this study are the average fibre diameter (MICRON), standard deviation of the fibre diameter distribution (SD) and the curliness of fibres (CURVE) expressed in degrees of fibre curvature per millimetre.

Supplementary Table 7. OFDA data for wool sample used in this study

| SAMPLE ID | Breed  | MICRON | SD  | CV   | CEM   | CF   | SF    | CURVE | BULK  |
|-----------|--------|--------|-----|------|-------|------|-------|-------|-------|
| D         | Romney | 33.02  | 6.6 | 19.9 | 11.48 | 34.5 | 31.84 | 45.9  | 25.71 |

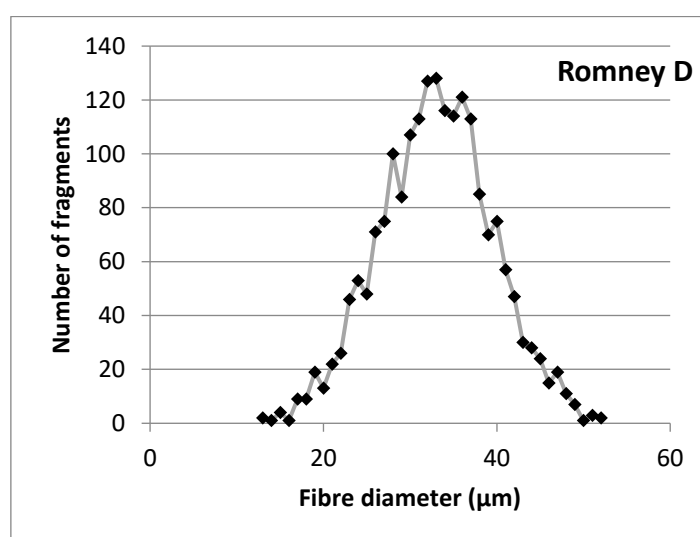

Supplementary Figure 1. OFDA diameter distribution of wool fibres from wool sample used in study.

## Tensile breakage of single fibres from same sample

Although single fibres were stretched and broken during the study (wet, dry but always with alkylating reagents present), the data from those tests were not reliable because the samples were mounted between plastic clips but stretched in an instrument designed for single fibres stabilised by metal crimps.

Reference data for the tensile properties of a select group of fibres from the Romney D sample is presented here. Two groups of fibres were tested, one containing 50 fibres and effectively a larger replicate of the groups used in the study ( $n = 25$ ) and a second set of 12 fibres which were selected in the same way as other fibres but for which the cross-section of the break surface was measured optically.

The root-end 30 mm of 50 fibres were individually mounted between pairs of clip-together plastic tabs (Dia-Stron, UK) used to grip the fibres during stretching and further secured

using UV cure glue (Dymax 3094-adhesive) (see main article for details). All the mounted fibres were placed in specially constructed plastic trays (Main article Figure 2 and Supplementary Supplementary Figure 2).

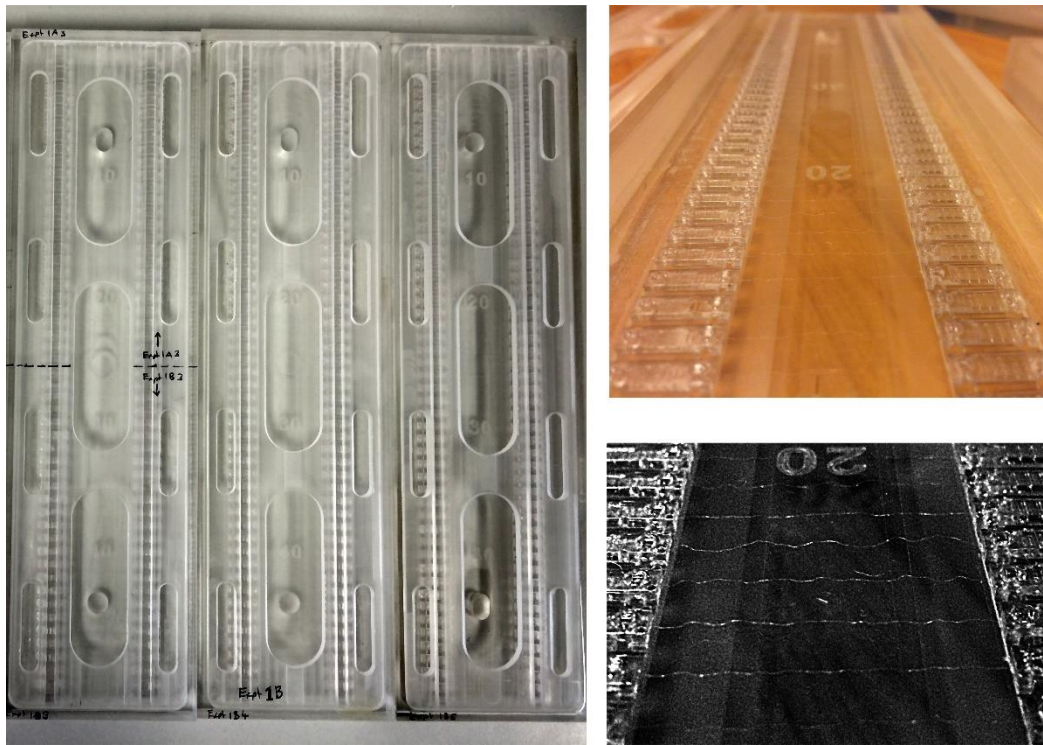

Supplementary Figure 2. Picture of the trays used in the study and insets images showing the arrangement of individual wool fibres.

For 12 of the fibres, the broken fibre ends were recovered and imaged end-on under a microscope (Zeiss Standard 14 with an Olympus DP12 digital camera) (Supplementary Figure 3) and the cross-sectional area (CSA) of the break measured (Olympus AnalySIS version 5) along with mean diameter (from 360 diameter measurements taken at 1 degree angles) and aspect ratio (the maximum diameter divided by minimum diameter).

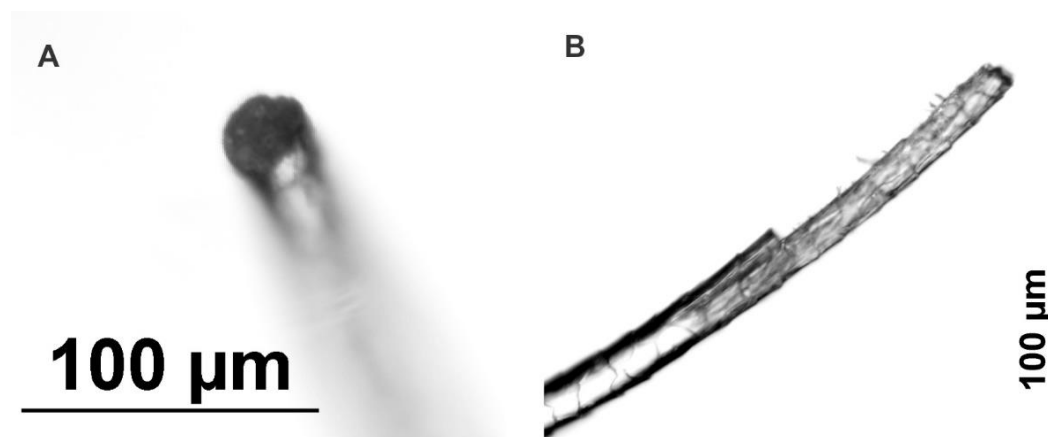

Supplementary Figure 3. Examples of break types. A. Oblique view of clean transverse break. B. Step break, common in dry condition.

Tensile tests were carried out to failure for each fibre (Dia Stron, UK, LEX820 linear extensometer with an ALS1500 automatic loading system). Data is plotted all fibres (Supplementary Supplementary Figure 4) and as stress/strain plots for the 12 fibres with Cross Sectional area of break surface data (Supplementary Supplementary Figure 5), and all data is summarised (Supplementary Supplementary Table 8).

**Description: Slot 1 : LEX Extension Method, Cycle: 1 Romney D**

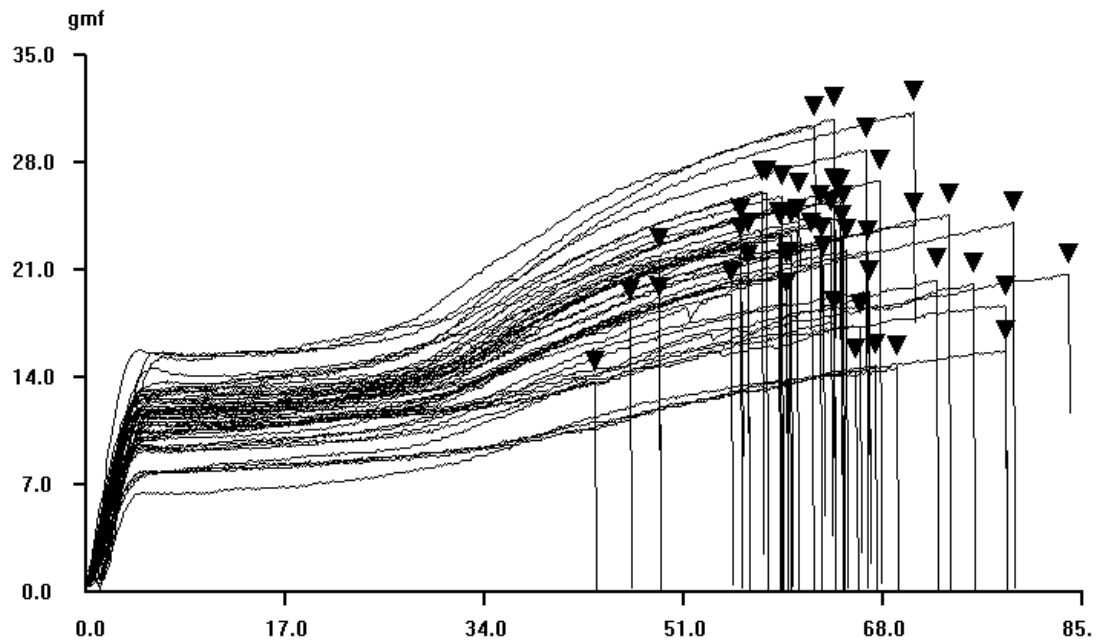

*Supplementary Figure 4. Tensile plots of all 50 wool fibres.*

**Description: Slot 1 : LEX Extension Method, Cycle: 1 Romney D**

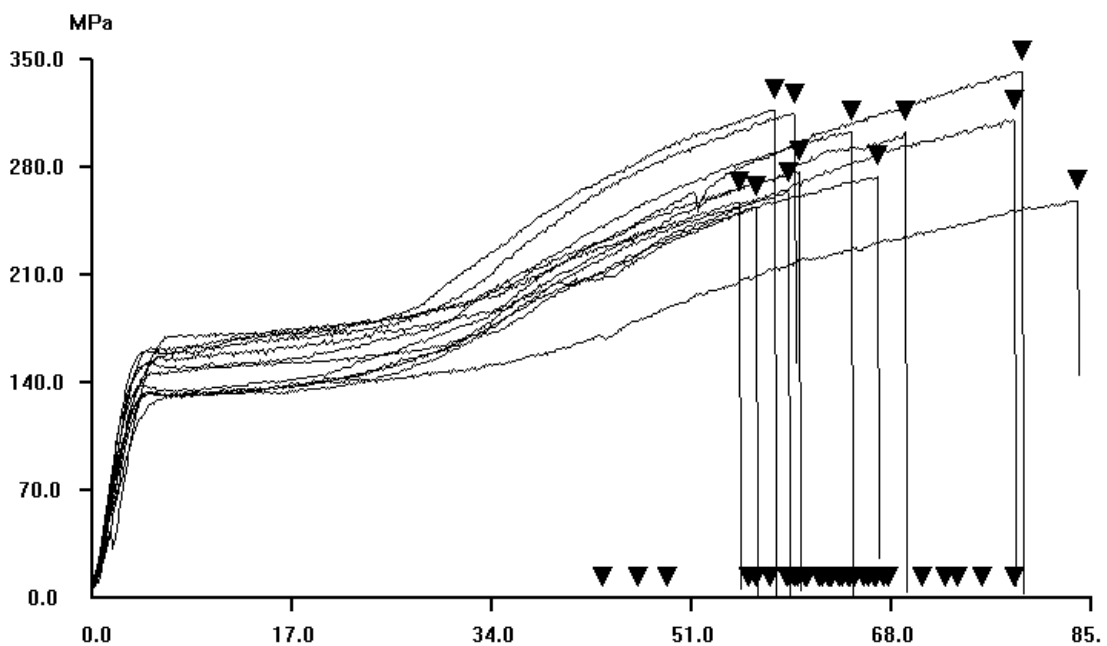

*Supplementary Figure 5. Tensile stress/strain plots for the 12 in which cross-section at break was measured.*

Supplementary Table 8. Tensile data summary from Dia Stron for Romney D with CSA for 12 samples. Note that properties dependent on CSA have only 12 data points whereas others have 50.

|            | CROSS-SECTIONAL AREA | ELASTIC_EMOD | ELASTIC_GRADIENT | ELASTIC_EXT | PLATEAU_LOAD | PLATEAU_STRESS | LOAD_15% | STRESS_15%    | WORK_15% |
|------------|----------------------|--------------|------------------|-------------|--------------|----------------|----------|---------------|----------|
|            | sq. microns          | N/m2(Pa)     | gmf/mm           | % Strain    | gmf          | gmf/sq micron  | gmf      | gmf/sq micron | Joules   |
| Min:       | 476.4                | 2.51E+09     | 35.4             | 3.26        | 7.32         | 0.0143         | 6.8      | 0.0137        | 3.52E-05 |
| Max:       | 864.9                | 4.38E+09     | 94.5             | 5.57        | 16.9         | 0.019          | 15.8     | 0.0177        | 9.07E-05 |
| Median:    | 764.55               | 3.55E+09     | 64.45            | 4.13        | 12.5         | 0.0162         | 11.95    | 0.01565       | 0.000063 |
| Mean:      | 713.275              | 3.56E+09     | 65.248           | 4.206       | 12.2748      | 0.016325       | 11.76    | 0.015633      | 6.22E-05 |
| Std. Dev.: | 128.7361             | 5.52E+08     | 12.66066         | 0.552626    | 2.066367     | 0.001647       | 1.919263 | 0.001606      | 1.05E-05 |
| data count | 12                   | 12           | 50               | 50          | 50           | 12             | 50       | 12            | 50       |

| LOAD_25% | STRESS_25%    | WORK_25% | YIELD_EXT | POSTYIELD_GRADIENT | BREAK_EXT | BREAK_LOAD | BREAK_STRESS  | TOTAL_WORK | TOUGHNESS |
|----------|---------------|----------|-----------|--------------------|-----------|------------|---------------|------------|-----------|
| gmf      | gmf/sq micron | Joules   | % Strain  | gmf/mm             | % Strain  | gmf        | gmf/sq micron | Joules     | Joules/m3 |
| 7.65     | 0.0146        | 6.53E-05 | 23.89     | 3.33               | 43.49     | 13.8       | 0.026         | 0.000182   | 94000000  |
| 17.1     | 0.0186        | 0.000162 | 44.23     | 9.97               | 83.87     | 31.3       | 0.035         | 0.000619   | 1.81E+08  |
| 12.9     | 0.0167        | 0.000115 | 33.73     | 6.465              | 63.3      | 22.65      | 0.02965       | 0.000404   | 1.25E+08  |
| 12.646   | 0.016792      | 0.000113 | 33.6606   | 6.2196             | 63.3988   | 22.282     | 0.029592      | 0.000398   | 1.3E+08   |
| 2.058825 | 0.001517      | 1.9E-05  | 4.129862  | 1.497167           | 8.146724  | 4.071187   | 0.002973      | 9.02E-05   | 26865298  |
| 50       | 12            | 50       | 50        | 50                 | 50        | 50         | 12            | 50         | 12        |

Plot below defines the properties in Supplementary Supplementary Table 8, the most useful of which are listed below in Supplementary Supplementary Figure 6

1. Elastic gradient
2. Post yield gradient
3. Plateau load (or stress if fibre CSA is known)
4. Break load (or stress if fibre CSA is known)
5. Elastic extent (or stress if fibre CSA is known)
6. Break extension (or stress if fibre CSA is known)
7. Yield extent

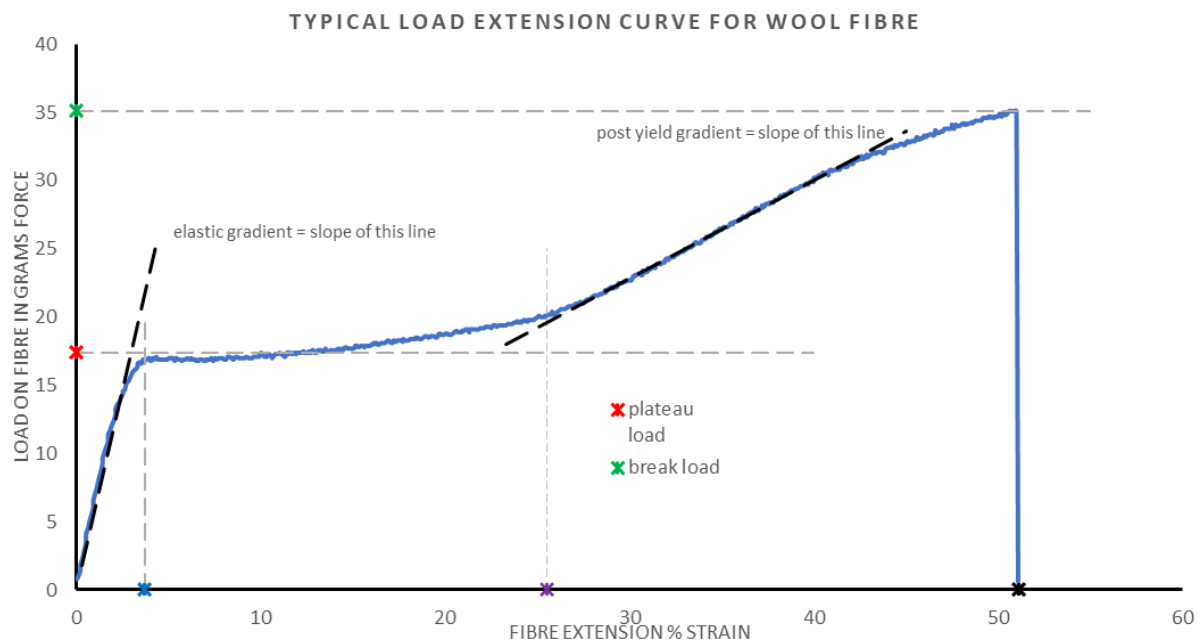

Supplementary Figure 6. Example data from a typical tensile extension test for a single wool fibre.
